# Supplementary material
Source: PubMed Central journal article supplement (PMC6105782)
Supplement: zac008187310s1.pdf [file zac008187310s1.pdf]

Supplemental file contents:

|                                                                                                                     |         |
|---------------------------------------------------------------------------------------------------------------------|---------|
| Table S1: <i>Pseudomonas</i> VAP data: observational studies (Benchmark groups)                                     | 2 - 4   |
| Table S2: <i>Pseudomonas</i> VAP data: non-PM-based methods of VAP prevention                                       | 5 - 9   |
| Table S3: <i>Pseudomonas</i> VAP data: Non concurrent control studies of topical PM based methods of VAP prevention | 10 – 11 |
| Table S4: <i>Pseudomonas</i> VAP data: Concurrent control studies of topical PM based methods of VAP prevention     | 12 – 14 |
| Details of analytic methods used                                                                                    | 15-16   |
| Table S5: Meta-regression models                                                                                    | 17      |
| References                                                                                                          | 19 - 31 |
| Figure S1. VAP prevention effect size; studies of non-polymyxin methods                                             | 32      |
| Figure S2. VAP prevention effect size; studies of topical-polymyxin methods                                         | 33      |
| Figure S3. <i>Pseudomonas</i> VAP incidence among observational studies.                                            | 34      |
| Figure S4. <i>Pseudomonas</i> VAP incidence among control groups from studies of non-polymyxin methods.             | 35      |
| Figure S5. <i>Pseudomonas</i> VAP incidence among intervention groups from studies of non-polymyxin methods.        | 36      |
| Figure S6. <i>Pseudomonas</i> VAP incidence among NCC studies of topical polymyxin.                                 | 37      |
| Figure S7. <i>Pseudomonas</i> VAP incidence among CC studies of topical polymyxin.                                  | 38      |
| Figure S8. Overall VAP incidence per 100 patients for all component groups                                          | 39      |
| Fig 9. <i>Pseudomonas</i> VAP incidence funnel plots: observational studies (Benchmark groups)                      | 40      |
| Fig S10 & S11. <i>Pseudomonas</i> VAP incidence funnel plots: non-PM-based methods                                  | 41      |
| Fig S12 & S13. <i>Pseudomonas</i> VAP incidence funnel plots: NCC topical PM methods                                | 42      |
| Fig S14 & S15. <i>Pseudomonas</i> VAP incidence funnel plots: CC topical PM methods                                 | 43      |
| Figure S16. <i>Pseudomonas</i> VAP incidence for three hybrid design studies                                        | 44      |

**Table S1: *Pseudomonas* VAP data: observational studies (Benchmark groups) <sup>a</sup>**

| author          | Year | Ref | Notes    | MV% | Patients<br>(n) | vap_n | PsVAP | PsVAP % |
|-----------------|------|-----|----------|-----|-----------------|-------|-------|---------|
| A'court         | 1993 | 1   | T,       | 100 | 150             | 33    | 17    | 11.3    |
| Alvarez-Lerma   | 1996 | 2   |          | 93  | 6494            | 519   | 174   | 2.7     |
| Antonelli       | 1994 | 3   | T, Md, B | 67  | 124             | 41    | 5     | 4.0     |
| Apostolopoulou  | 2003 | 4   | Md,      | 100 | 175             | 56    | 17    | 9.7     |
| Beck-Sague      | 1996 | 5   | T, US,   | 100 | 145             | 15    | 5     | 3.4     |
| Bekaert         | 2011 | 6   | B        | 100 | 4479            | 685   | 155   | 3.5     |
| Bercault_IHT    | 2005 | 7   |          | 100 | 118             | 31    | 9     | 7.6     |
| Bercault_noINT  | 2005 | 7   | I        | 100 | 118             | 12    | 3     | 2.5     |
| Berrouane_all   | 2001 | 8   | T, B     | 83  | 565             | 129   | 40    | 7.1     |
| Bochicchio      | 2004 | 9   | T, US,   | 100 | 678             | 125   | 22    | 3.2     |
| Bonten'94       | 1994 | 10  | B        | 100 | 64              | 11    | 6     | 9.4     |
| Boots           | 2008 | 11  | B        | 100 | 412             | 58    | 15    | 3.6     |
| Bornstain       | 2004 | 12  | B        | 100 | 747             | 80    | 23    | 3.1     |
| Braun           | 1986 | 13  | T, US,   | 100 | 66              | 15    | 0     | 0       |
| Bregeon         | 1997 | 14  | B        | 100 | 660             | 223   | 33    | 5.0     |
| Bronchard       | 2004 | 15  | T, B     | 100 | 109             | 45    | 0     | 0       |
| Cade            | 1993 | 16  |          | 98  | 98              | 35    | 4     | 4.1     |
| Cavalcanti      | 2006 | 17  | T, Md, B | 100 | 190             | 62    | 9     | 4.7     |
| Cenderero       | 1999 | 18  | Md, B    | 100 | 123             | 19    | 4     | 3.3     |
| Chaari          | 2015 | 19  | T, Md,   | 100 | 175             | 48    | 20    | 11.4    |
| Chastre         | 1998 | 20  | B        | 100 | 243             | 84    | 36    | 15.0    |
| Chevret         | 1993 | 21  | B        | 100 | 255             | 55    | 21    | 8.2     |
| Cook_non-trauma | 2010 | 22  | US, B    | 100 | 2080            | 70    | 7     | 0.3     |
| Cook_trauma     | 2010 | 22  | T, US, B | 100 | 511             | 91    | 16    | 3.1     |
| Craven-medical  | 1988 | 23  | US,      | 100 | 277             | 47    | 9     | 3.2     |
| Craven-surgical | 1988 | 23  | US,      | 100 | 521             | 49    | 17    | 3.3     |
| Daschner        | 1988 | 24  |          | 100 | 116             | 36    | 9     | 7.8     |
| de_Latorre      | 1995 | 25  | Md, B    | 100 | 80              | 12    | 7     | 8.8     |
| Ensminger       | 2006 | 26  | C, US,   | 100 | 92              | 17    | 2     | 2.2     |
| Evans           | 2010 | 27  | US, Tr   | 100 | 416             | 101   | 18    | 4.5     |
| Ewig            | 1999 | 28  | T, Md, B | 100 | 48              | 10    | 4     | 8.3     |
| Fagon'89        | 1989 | 29  | B        | 100 | 567             | 49    | 16    | 2.8     |
| Gacouin         | 2009 | 30  | B        | 100 | 361             | 76    | 21    | 5.8     |
| Garrouste-Orgas | 1997 | 31  | B        | 100 | 86              | 31    | 9     | 10.5    |
| George          | 1998 | 32  | US, B    | 100 | 223             | 28    | 6     | 2.7     |
| Georges         | 2000 | 33  | B        | 100 | 135             | 35    | 19    | 14.1    |
| Giard           | 2008 | 34  | B        | 100 | 7236            | 946   | 168   | 2.3     |
| Gruson-95-96    | 2000 | 35  | B        | 100 | 1004            | 231   | 62    | 6.2     |
| Gruson-97-98    | 2000 | 35  | B        | 100 | 1029            | 161   | 47    | 4.6     |
| Gruson-99-01    | 2003 | 36  | B        | 100 | 823             | 134   | 41    | 5.0     |

**Table S1 (continued): *Pseudomonas* VAP data: observational studies (Benchmark groups)**

| author            | Year | Ref | Notes    | MV% | Patients<br>(n) | vap_n | PsVAP | PsVAP % |
|-------------------|------|-----|----------|-----|-----------------|-------|-------|---------|
| Guérin            | 1997 | 37  | B        | 100 | 260             | 27    | 14    | 5.4     |
| Heyland           | 1999 | 38  | US, B    | 100 | 1014            | 177   | 38    | 3.7     |
| Hortal            | 2009 | 39  | C, Md,   | 100 | 231             | 106   | 40    | 17.3    |
| Hugonnet          | 2007 | 40  | B        | 100 | 936             | 209   | 31    | 3.3     |
| Hyllienmark       | 2013 | 41  | T, B     | 100 | 135             | 45    | 4     | 3.0     |
| Ibáñez            | 2000 | 42  | Md,      | 100 | 30              | 6     | 1     | 3.3     |
| Ibrahim'00        | 2000 | 43  | US,      | 100 | 1882            | 397   | 130   | 6.9     |
| Jaillette         | 2011 | 44  |          | 100 | 439             | 137   | 59    | 13.4    |
| Jimenez           | 1989 | 45  | Md,      | 100 | 77              | 18    | 7     | 9.1     |
| Kallel            | 2005 | 46  | T, Md,   | 100 | 241             | 77    | 34    | 14.1    |
| Kollef '93        | 1993 | 47  | US,      | 100 | 277             | 43    | 4     | 1.4     |
| Kollef '95        | 1995 | 48  | US,      | 100 | 314             | 87    | 16    | 5.1     |
| Kollef '97        | 1997 | 49  | US,      | 100 | 521             | 77    | 15    | 2.9     |
| Kollef '97_post   | 1997 | 50  | C, US,   | 100 | 327             | 23    | 3     | 0.9     |
| Kollef '97_pre    | 1997 | 50  | C, US,   | 100 | 353             | 42    | 7     | 2.0     |
| Kollef14_Europe   | 2014 | 51  |          | 100 | 495             | 96    | 24    | 4.8     |
| Kollef14_USA      | 2014 | 51  | US,      | 100 | 502             | 68    | 17    | 3.4     |
| Koss– N           | 2001 | 52  | US       | 100 | 87              | 17    | 4     | 4.6     |
| Koss– P           | 2001 | 52  | US, I    | 100 | 66              | 24    | 9     | 13.7    |
| Kunac             | 2014 | 53  | T, US, B | 100 | 716             | 206   | 23    | 3.2     |
| Lepelletier       | 2010 | 54  | T,       | 100 | 161             | 34    | 10    | 6.2     |
| Luyt              | 2005 | 55  |          | 100 | 290             | 69    | 11    | 3.8     |
| Magnason          | 2008 | 56  |          | 100 | 280             | 21    | 5     | 1.8     |
| Magret_non-trauma | 2010 | 57  |          | 100 | 2082            | 337   | 64    | 3.1     |
| Magret_trauma     | 2010 | 57  | T,       | 100 | 354             | 128   | 17    | 4.8     |
| Mahul             | 1992 | 58  | B        | 100 | 145             | 30    | 8     | 5.5     |
| Makris            | 2011 | 59  | B        | 100 | 152             | 44    | 7     | 4.6     |
| Markowicz         | 2000 | 60  | B        | 100 | 744             | 162   | 58    | 7.8     |
| Michel            | 2005 | 61  | B        | 100 | 299             | 41    | 12    | 4.0     |
| Moine             | 2002 | 62  | B        | 80  | 764             | 89    | 27    | 3.5     |
| Myny              | 2005 | 63  |          | 100 | 385             | 89    | 28    | 7.3     |
| Nguile-Makao      | 2010 | 64  | B        | 100 | 2873            | 434   | 130   | 4.5     |
| Nielsen           | 1992 | 65  |          | 100 | 242             | 23    | 3     | 1.2     |
| Nseir             | 2005 | 66  |          | 100 | 1241            | 77    | 32    | 2.6     |
| Papazian          | 1996 | 67  | B        | 100 | 586             | 97    | 26    | 4.4     |
| Potgieter         | 1987 | 68  |          | 78  | 250             | 51    | 26    | 10.4    |
| Raineri           | 2010 | 69  | I, B     | 100 | 822             | 44    | 7     | 0.9     |
| Raineri           | 2010 | 69  | B        | 100 | 827             | 68    | 32    | 3.9     |
| Rello'91          | 1991 | 70  | Md, B    | 100 | 264             | 58    | 14    | 5.3     |
| Rello'92          | 1992 | 71  | Md, B, T | 80  | 161             | 42    | 4     | 2.5     |
| Rello'94          | 1994 | 72  | Md, B    | 100 | 568             | 72    | 18    | 3.2     |
| Rello'96          | 1996 | 73  | Md, B    | 100 | 83              | 21    | 4     | 4.8     |
| Rello'02          | 2002 | 74  | US,      | 100 | 9080            | 842   | 119   | 1.3     |

**Table S1 (continued): *Pseudomonas* VAP data: observational studies (Benchmark groups)**

| author         | Year | Ref | Notes    | MV% | Patients<br>(n) | vap_n | PsVAP | PsVAP % |
|----------------|------|-----|----------|-----|-----------------|-------|-------|---------|
| Reusser        | 1989 | 75  |          | 100 | 40              | 15    | 2     | 5.0     |
| Rincón-Ferrari | 2004 | 76  | T, Md, B | 100 | 310             | 72    | 6     | 1.9     |
| Rodriguez      | 1991 | 77  | T, US,   | 100 | 294             | 130   | 31    | 10.5    |
| Ruiz-Santana   | 1987 | 78  | B        | 100 | 1005            | 180   | 56    | 5.6     |
| Salata         | 1987 | 79  | US, B    | 100 | 51              | 21    | 7     | 13.7    |
| Shahin         | 2013 | 80  | US,      | 100 | 267             | 29    | 4     | 1.5     |
| Sofianou       | 2000 | 81  | Md,      | 100 | 198             | 67    | 19    | 9.6     |
| Stéphan        | 2006 | 82  | T,       | 100 | 175             | 78    | 14    | 8.0     |
| Tejada-Artigas | 2001 | 83  | T, Md, B | 100 | 103             | 23    | 5     | 4.9     |
| Timsit         | 1996 | 84  | B        | 100 | 387             | 56    | 11    | 2.8     |
| Torres         | 1990 | 85  | Md, B    | 100 | 322             | 78    | 5     | 1.6     |
| Trouillet      | 1998 | 86  | B        | 100 | 498             | 135   | 39    | 7.8     |
| Urli           | 2002 | 87  | Md,      | 95  | 178             | 116   | 27    | 15.2    |
| Valles         | 2007 | 88  | Md,      | 100 | 60              | 40    | 15    | 25.0    |
| Vanhems        | 2011 | 89  | B        | 100 | 3387            | 367   | 24    | 0.7     |
| Verhamme       | 2007 | 90  |          | 84  | 4000            | 298   | 54    | 1.4     |
| Violan         | 1998 | 91  | Md, B    | 100 | 314             | 82    | 25    | 8.0     |
| Woske          | 2001 | 92  | B        | 100 | 103             | 49    | 8     | 7.8     |
| Zahar          | 2009 | 93  | B        | 100 | 1233            | 208   | 62    | 5.0     |

## Table S1 footnotes

T – Data originating from a study for which the majority of ICU admission were for trauma

C - Data originating from a study for which the ICU admission were for cardio thoracic surgery

Md - Data originating from a study based in a country from the Mediterranean region.

US - Data originating from a study based in the United States of America or Canada

B – VAP diagnosis based on bronchoscopic based methods for sampling.

I – Infection control intervention to entire ICU

PsVAP - *Pseudomonas* VAP

Several (n = 43) of these studies were cited in the following source systematic reviews.

- Melsen WG, Rovers MM, Bonten MJM: Ventilator-associated pneumonia and mortality: A systematic review of observational studies. *Crit Care Med* 2009, 37:2709–2718.
- Safdar N, Dezfulian C, Collard HR, Saint S: Clinical and economic consequences of ventilator-associated pneumonia: a systematic review. *Crit Care Med* 2005, 33:2184–93.
- Agrafiotis M, Siempos II, Ntaidou TK, Falagas ME. Attributable mortality of ventilator-associated pneumonia: a meta-analysis. *Intern J Tub Lung Dis.* 2011;15(9):1154-1163.

**Table S2: *Pseudomonas* VAP data: non-PM-based methods of VAP prevention <sup>a</sup>**

| author                | Year | Ref | Notes  | MV% | Patients<br>(n) | vap_n | PsVAP | PsVAP % |
|-----------------------|------|-----|--------|-----|-----------------|-------|-------|---------|
| <b>control groups</b> |      |     |        |     |                 |       |       |         |
| Acosta-<br>escribano  | 2010 | 94  | T, Md, | 100 | 54              | 31    | 4     | 7.4     |
| Bonten '95            | 1995 | 95  | B      | 100 | 74              | 16    | 7     | 9.5     |
| Boots'06_All          | 2006 | 96  |        | 100 | 381             | 59    | 14    | 3.7     |
| Combes                | 2000 | 97  | T,     | 100 | 50              | 4     | 0     | 0       |
| Cook                  | 1998 | 98  | US,    | 100 | 596             | 114   | 20    | 3.4     |
| Daumal                | 1999 | 99  |        | 100 | 174             | 25    | 11    | 6.3     |
| Djedaini              | 1995 | 100 | B      | 100 | 61              | 6     | 0     | 0       |
| Drakulovic            | 1999 | 101 | Md,    | 100 | 47              | 11    | 3     | 6.4     |
| Dreyfuss '91          | 1991 | 102 | B      | 100 | 35              | 11    | 3     | 8.6     |
| Dreyfuss '95          | 1995 | 103 | B      | 100 | 70              | 8     | 1     | 1.4     |
| Driks                 | 1987 | 104 |        | 100 | 69              | 16    | 5     | 7.2     |
| Fabian                | 1993 | 105 | T, US, | 100 | 278             | 81    | 10    | 3.6     |
| Forestier             | 2008 | 106 | T, B   | 100 | 106             | 21    | 8     | 7.5     |
| Fourrier'00           | 2000 | 107 |        | 100 | 30              | 15    | 4     | 13.3    |
| Fourrier'05           | 2005 | 108 |        | 100 | 114             | 12    | 5     | 4.4     |
| Genuit (C & T)        | 2001 | 109 | US,    | 100 | 78              | 27    | 12    | 15.4    |
| Heyland               | 1999 | 110 | US,    | 100 | 46              | 7     | 0     | 0       |
| Holzapfel_C_93        | 1993 | 111 | B      | 100 | 149             | 17    | 0     | 0       |
| Holzapfel_C_99        | 1999 | 112 | B      | 100 | 200             | 51    | 6     | 3.0     |
| Kantorova All         | 2004 | 113 | T,     | 100 | 287             | 25    | 5     | 1.7     |
| Kirschenbaum          | 2002 | 114 | US, B  | 100 | 20              | 10    | 5     | 25.0    |
| Kirton                | 1997 | 115 | T, US, | 100 | 140             | 22    | 6     | 4.3     |
| Knight                | 2009 | 116 |        | 100 | 129             | 17    | 1     | 0.8     |
| Koeman                | 2006 | 117 |        | 100 | 130             | 23    | 4     | 3.1     |
| Kollef '95            | 1995 | 118 | US,    | 100 | 300             | 80    | 23    | 7.7     |
| Kollef'08             | 2008 | 119 | US, B  | 100 | 743             | 56    | 11    | 1.5     |
| Kortbeek              | 1999 | 120 | T, US, | 100 | 43              | 18    | 0     | 0       |
| Kostadima             | 2005 | 121 | Md,    | 100 | 21              | 8     | 2     | 9.5     |
| Lacherade '05         | 2005 | 122 | B      | 100 | 184             | 53    | 14    | 7.6     |
| Lacherade '10         | 2010 | 123 | B      | 100 | 164             | 42    | 16    | 9.8     |
| Laggner               | 1989 | 124 |        | 100 | 16              | 2     | 0     | 0       |
| Laueny                | 2014 | 125 | T,     | 100 | 91              | 11    | 0     | 0       |

**Table S2 (continued): *Pseudomonas* VAP data: non-PM-based methods of VAP prevention <sup>a</sup>**

| author                            | Year | Ref | Notes  | MV% | Patients<br>(n) | vap_n | PsVAP | PsVAP % |
|-----------------------------------|------|-----|--------|-----|-----------------|-------|-------|---------|
| <b>control groups (continued)</b> |      |     |        |     |                 |       |       |         |
| Lorente '03                       | 2003 | 126 | Md, B  | 100 | 116             | 26    | 10    | 8.6     |
| Lorente '04                       | 2004 | 127 | Md, B  | 100 | 143             | 33    | 8     | 5.6     |
| Lorente'05                        | 2005 | 128 | Md, B  | 100 | 233             | 42    | 12    | 5.2     |
| Lorente'06                        | 2006 | 129 | Md, B  | 100 | 221             | 31    | 7     | 3.2     |
| Lorente'06                        | 2006 | 130 | Md, B  | 100 | 51              | 8     | 5     | 9.8     |
| Lorente'07                        | 2007 | 131 | Md,    | 100 | 140             | 31    | 4     | 2.9     |
| Lorente'12                        | 2012 | 132 | Md,    | 100 | 219             | 24    | 5     | 2.3     |
| Lorente'14                        | 2014 | 133 | Md,    | 100 | 150             | 33    | 6     | 4.0     |
| Manzano                           | 2008 | 134 | Md,    | 100 | 63              | 16    | 0     | 0       |
| Martin                            | 1993 | 135 | US, PI | 100 | 66              | 6     | 2     | 3       |
| Morrow                            | 2010 | 136 | US, B  | 100 | 73              | 28    | 6     | 8.2     |
| Nseir                             | 2011 | 137 | B      | 100 | 61              | 16    | 2     | 3.3     |
| Pickworth                         | 1993 | 138 | T, US, | 100 | 44              | 5     | 1     | 2.3     |
| Pneumatikos                       | 2006 | 139 | T, Md, | 100 | 40              | 11    | 1     | 2.5     |
| Prod'hom_A                        | 1994 | 140 |        | 100 | 81              | 18    | 4     | 4.9     |
| Reigneir                          | 2013 | 141 | B      | 100 | 222             | 35    | 9     | 4.1     |
| Rumbak                            | 2004 | 142 | US,    | 100 | 60              | 15    | 5     | 8.3     |
| Ryan_C                            | 1993 | 143 | US,    | 100 | 56              | 7     | 2     | 3.6     |
| Seguin '06                        | 2006 | 144 | T, B   | 100 | 62              | 25    | 1     | 1.6     |
| Seguin '14                        | 2014 | 145 | T, B   | 100 | 72              | 20    | 1     | 1.4     |
| Smulders                          | 2002 | 146 |        | 100 | 75              | 12    | 3     | 4.0     |
| Staudinger                        | 2010 | 147 | B      | 100 | 75              | 17    | 5     | 6.7     |
| Swan                              | 2016 | 148 | US     | 57  | 164             | 13    | 1     | 0.6     |
| Thomachot '98                     | 1998 | 149 | B      | 100 | 66              | 21    | 3     | 4.5     |
| Thomachot '99                     | 1999 | 150 | T,     | 100 | 77              | 24    | 1     | 1.3     |
| Thomachot '02                     | 2002 | 151 | T,     | 100 | 84              | 22    | 2     | 2.4     |
| Valencia                          | 2007 | 152 | Md, B  | 100 | 69              | 10    | 1     | 1.4     |
| Valles                            | 1995 | 153 | Md, B  | 100 | 77              | 25    | 12    | 15.6    |

**Table S2: *Pseudomonas* VAP data: non-PM-based methods of VAP prevention <sup>a</sup>**

| author                     | Year | Ref | Notes  | MV% | Patients<br>(n) | vap_n | PsVAP | PsVAP % |
|----------------------------|------|-----|--------|-----|-----------------|-------|-------|---------|
| <b>intervention groups</b> |      |     |        |     |                 |       |       |         |
| Acosta-escribano           | 2010 | 94  | T, Md, | 100 | 50              | 16    | 3     | 6.0     |
| Bonten '95                 | 1995 | 95  | B      | 100 | 67              | 15    | 11    | 16.4    |
| Combes                     | 2000 | 97  | T,     | 100 | 54              | 10    | 0     | 0       |
| Cook                       | 1998 | 98  | US,    | 100 | 604             | 98    | 21    | 3.5     |
| Daumal                     | 1999 | 99  |        | 100 | 187             | 30    | 12    | 6.4     |
| Djedaini                   | 1995 | 100 |        | 100 | 68              | 8     | 3     | 4.4     |
| Drakulovic                 | 1999 | 101 | Md,    | 100 | 39              | 2     | 1     | 2.6     |
| Dreyfuss                   | 1991 | 102 | B      | 100 | 28              | 8     | 1     | 3.6     |
| Dreyfuss                   | 1995 | 103 | B      | 100 | 61              | 6     | 0     | 0       |
| Driks                      | 1987 | 104 |        | 100 | 61              | 7     | 1     | 1.6     |
| Forestier                  | 2008 | 106 | T, B   | 100 | 102             | 19    | 3     | 2.9     |
| Fourrier'00                | 2000 | 107 |        | 100 | 30              | 5     | 1     | 3.3     |
| Fourrier'05                | 2005 | 108 |        | 100 | 114             | 13    | 6     | 5.3     |
| Heyland                    | 1999 | 110 | US,    | 100 | 49              | 3     | 0     | 0       |
| Holzapfel_I_99             | 1999 | 112 | B      | 100 | 199             | 37    | 10    | 5.0     |
| Kirschenbaum               | 2002 | 114 | US, B  | 100 | 17              | 3     | 1     | 5.9     |
| Kirton                     | 1997 | 115 | T, US, | 100 | 140             | 9     | 6     | 4.3     |
| Knight                     | 2009 | 116 |        | 100 | 130             | 12    | 0     | 0       |
| Koeman-Ch                  | 2006 | 117 |        | 100 | 127             | 13    | 0     | 0       |
| Kollef'08_silverETT        | 2008 | 119 | US, B  | 100 | 766             | 37    | 8     | 1.0     |
| Kortbeek                   | 1999 | 120 | T, US, | 100 | 37              | 10    | 0     | 0       |
| Kostadima                  | 2005 | 121 | Md,    | 100 | 20              | 2     | 0     | 0       |
| Lacherade '05              | 2005 | 122 | B      | 100 | 185             | 47    | 9     | 4.9     |
| Lacherade '10              | 2010 | 123 | B      | 100 | 169             | 25    | 9     | 5.3     |
| Laggner                    | 1989 | 124 |        | 100 | 16              | 1     | 0     | 0       |
| Laueny                     | 2014 | 125 | T,     | 100 | 98              | 37    | 0     | 0       |

**Table S2: *Pseudomonas* VAP data: non-PM-based methods of VAP prevention <sup>a</sup>**

| author                                 | Year | Ref | Notes  | MV% | Patients<br>(n) | vap_n | PsVAP | PsVAP % |
|----------------------------------------|------|-----|--------|-----|-----------------|-------|-------|---------|
| <b>intervention groups (continued)</b> |      |     |        |     |                 |       |       |         |
| Lorente '03                            | 2003 | 126 | Md, B  | 100 | 114             | 29    | 9     | 7.9     |
| Lorente '04                            | 2004 | 127 | Md, B  | 100 | 161             | 37    | 9     | 5.6     |
| Lorente'05                             | 2005 | 128 | Md, B  | 100 | 210             | 43    | 12    | 5.7     |
| Lorente'06                             | 2006 | 129 | Md, B  | 100 | 53              | 21    | 2     | 3.8     |
| Lorente'06                             | 2006 | 130 | Md, B  | 100 | 236             | 33    | 9     | 3.8     |
| Lorente'07                             | 2007 | 131 | Md,    | 100 | 140             | 11    | 4     | 2.9     |
| Lorente'12                             | 2012 | 132 | Md,    | 100 | 217             | 21    | 5     | 2.3     |
| Lorente'14                             | 2014 | 133 | Md,    | 100 | 134             | 15    | 3     | 2.2     |
| Manzano                                | 2008 | 134 | Md,    | 100 | 64              | 6     | 0     | 0       |
| Martin                                 | 1993 | 135 | US     | 100 | 65              | 2     | 0     | 0       |
| Morrow                                 | 2010 | 136 | US, B  | 100 | 73              | 13    | 0     | 0       |
| Nseir                                  | 2011 | 137 | B      | 100 | 61              | 6     | 0     | 0       |
| Pneumatikos                            | 2006 | 139 | T, Md, | 100 | 39              | 6     | 0     | 0       |
| Prod'hom_R                             | 1994 | 140 |        | 100 | 80              | 22    | 1     | 1.3     |
| Prod'hom_S                             | 1994 | 140 |        | 100 | 83              | 11    | 1     | 1.2     |
| Reigneir                               | 2013 | 141 | B      | 100 | 227             | 38    | 12    | 5.3     |
| Rumbak                                 | 2004 | 142 | US,    | 100 | 60              | 3     | 1     | 1.7     |
| Ryan_S                                 | 1993 | 143 | US,    | 100 | 58              | 8     | 1     | 1.7     |
| Seguin-PVI                             | 2006 | 144 | T, B   | 100 | 36              | 3     | 0     | 0       |
| Seguin                                 | 2014 | 145 | T, B   | 100 | 78              | 24    | 3     | 3.8     |
| Smulders                               | 2002 | 146 |        | 100 | 75              | 3     | 1     | 1.3     |
| Staudinger                             | 2010 | 147 | B      | 100 | 75              | 8     | 3     | 4.0     |
| Swan                                   | 2016 | 148 | US     | 69  | 161             | 8     | 1     | 0.6     |
| Thomachot                              | 1998 | 149 | B      | 100 | 70              | 26    | 2     | 2.9     |
| Thomachot                              | 1999 | 150 | T,     | 100 | 63              | 21    | 2     | 3.2     |
| Thomachot                              | 2002 | 151 |        | 100 | 71              | 10    | 0     | 0       |
| Valencia                               | 2007 | 152 | Md, B  | 100 | 73              | 11    | 3     | 4.1     |
| Valles                                 | 1995 | 153 | Md, B  | 100 | 76              | 14    | 12    | 15.8    |

## Table S2 footnotes

T – Data originating from a study for which the majority of ICU admission were for trauma

C - Data originating from a study for which the ICU admission were for cardio thoracic surgery

Md - Data originating from a study based in a country from the Mediterranean region.

US - Data originating from a study based in the United States of America or Canada

B – VAP diagnosis based on bronchoscopic based methods for sampling.

PsVAP - *Pseudomonas* VAP

Several (n = 47) of these studies were cited in the following source systematic reviews.



- Messori A, Trippoli S, Vaiani M, Gorini M, Corrado A: Bleeding and pneumonia in intensive care patients given ranitidine and sucralfate for prevention of stress ulcer: meta-analysis of randomised controlled trials. *BMJ* 2000, 321:1103–1106.
- Huang J, Cao Y, Liao C, Wu L, Gao F: Effect of histamine-2-receptor antagonists versus sucralfate on stress ulcer prophylaxis in mechanically ventilated patients: a meta-analysis of 10 randomized controlled trials. *Crit Care* 2010, 14:R194.
- Alhazzani W, Almasoud A, Jaeschke R, Lo BW, Sindi A, Altayyar S, Fox-Robichaud A: Small bowel feeding and risk of pneumonia in adult critically ill patients: a systematic review and meta-analysis of randomized trials. *Crit Care* 2013, 17:R127.
- Chan EY, Ruest A, Meade MO, Cook DJ: Oral decontamination for prevention of pneumonia in mechanically ventilated adults: systematic review and meta-analysis. *BMJ* 2007, 334:889–900.
- Labeau SO, Van de Vyver K, Brusselaers N, Vogelaers D, Blot SI: Prevention of ventilator-associated pneumonia with oral antiseptics: a systematic review and meta-analysis. *Lancet Infect Dis* 2011, 11:845-854.
- Melsen WG, Rovers MM, Bonten MJM: Ventilator-associated pneumonia and mortality: A systematic review of observational studies. *Crit Care Med* 2009, 37:2709–2718.
- Safdar N, Dezfulian C, Collard HR, Saint S: Clinical and economic consequences of ventilator-associated pneumonia: a systematic review. *Crit Care Med* 2005, 33:2184–93.
- Han J, Liu Y. Effect of ventilator circuit changes on ventilator-associated pneumonia: a systematic review and meta-analysis. *Respiratory care*, 2010; 55: 467-474.
- Subirana M, Solà I, Benito S: Closed tracheal suction systems versus open tracheal suction systems for mechanically ventilated adult patients. *Cochrane Database Syst Rev* 2007, 4: CD004581;
- Siempos II, Vardakas KZ, Kopterides P, Falagas ME. Impact of passive humidification on clinical outcomes of mechanically ventilated patients: A meta-analysis of randomized controlled trials. *Crit Care Med* 2007; 35: 2843-51;
- Muscedere J, Rewa O, McKechnie K, Jiang X, Laporta D, Heyland DK. Subglottic secretion drainage for the prevention of ventilator-associated pneumonia: a systematic review and meta-analysis. *Crit Care Med* 2011; 39:1985–1991.
- Delaney A, Gray H, Laupland KB, Zuege DJ. Kinetic bed therapy to prevent nosocomial pneumonia in mechanically ventilated patients: a systematic review and meta-analysis. *Crit Care* 2006; 10:R70;
- Sud S, Friedrich JO, Taccone P, Polli F, Adhikari NK, Latini R, Gattinoni L. Prone ventilation reduces mortality in patients with acute respiratory failure and severe hypoxemia: systematic review and meta-analysis. *Inten Care Med* 2010; 36(4); 585-599.
- Siempos II, Vardakas KZ, Falagas ME. Closed tracheal suction systems for prevention of ventilator-associated pneumonia. *Brit J Anaesthesia*, 2008; 100(3): 299-306.

**Table S3: *Pseudomonas* VAP data: Non-Concurrent control studies of topical PM based methods of VAP prevention <sup>a</sup>**

| author                     | Year | Ref      | Notes              | MV % | Patients (n) | vap_n | PsVAP | PsVAP % |
|----------------------------|------|----------|--------------------|------|--------------|-------|-------|---------|
| <b>control groups</b>      |      |          |                    |      |              |       |       |         |
| Bergmans NC                | 2001 | 154      | B                  | 100  | 61           | 14    | 5     | 8.2     |
| Bonten NC                  | 1994 | 155      | B                  | 100  | 54           | 7     | 4     | 7.4     |
| Feeley                     | 1975 | 156, 192 | US                 | NS   | 711          | 78    | 45    | 6.3     |
| Godard                     | 1990 | 157      | B                  | 80   | 84           | 13    | 5     | 6       |
| Klick                      | 1975 | 158      | US                 | NS   | 371          | 30    | 17    | 4.6     |
| Konrad                     | 1989 | 159      |                    | 100  | 83           | 22    | 9     | 10.8    |
| Stoutenbeek'84             | 1984 | 160      | T                  | 100  | 59           | 35    | 5     | 8.5     |
| Stoutenbeek'87             | 1987 | 161      | T                  | 100  | 59           | 35    | 5     | 8.5     |
| Winter NC                  | 1992 | 162      | B                  | 92   | 84           | 11    | 2     | 2.4     |
| <b>intervention groups</b> |      |          |                    |      |              |       |       |         |
| Bos                        | 2017 | 163      | <sup>1,2</sup>     | 100  | 1573         | 69    | 4     | 0.3     |
| Feeley                     | 1975 | 156, 192 | US <sup>3</sup>    | NS   | 292          | 11    | 1     | 0.3     |
| Garbino                    | 2002 | 164      | B <sup>4</sup>     | 100  | 204          | 20    | 4     | 2       |
| Godard                     | 1990 | 157      | B <sup>1</sup>     | 100  | 97           | 2     | 0     | 0       |
| Klick                      | 1975 | 158      | US <sup>3</sup>    | NS   | 374          | 18    | 3     | 0.8     |
| Konrad                     | 1989 | 159      | <sup>2</sup>       | 100  | 82           | 5     | 2     | 2.4     |
| Leone                      | 2002 | 165      | T <sup>5</sup>     | 100  | 324          | 58    | 3     | 0.9     |
| Nardi                      | 2001 | 166      | Md, B <sup>1</sup> | 100  | 104          | 20    | 4     | 3.8     |
| Nardi                      | 2001 | 166      | Md, B <sup>6</sup> | 100  | 119          | 9     | 3     | 2.5     |
| Rouby                      | 1994 | 167      | <sup>7</sup>       | 100  | 347          | 97    | 12    | 3.5     |
| Silvestri'99               | 1999 | 168      | <sup>1</sup>       | 100  | 117          | 5     | 2     | 1.7     |
| Silvestri'02               | 2002 | 169      | Md <sup>1</sup>    | 100  | 130          | 21    | 3     | 2.3     |
| Stoutenbeek SDD            | 1984 | 160      | T <sup>2</sup>     | 100  | 63           | 5     | 0     | 0       |
| Stoutenbeek ED             | 1987 | 161      | T <sup>1</sup>     | 100  | 42           | 23    | 1     | 2.4     |
| Veelo                      | 2008 | 170      | <sup>2</sup>       | 100  | 231          | 14    | 2     | 0.9     |

**Table S3 (continued): *Pseudomonas* VAP data: Non-Concurrent control studies of topical PM based methods of VAP prevention <sup>a</sup>**

Footnotes

T – Data originating from a study for which the majority of ICU admission were for trauma

C - Data originating from a study for which the ICU admission were for cardio thoracic surgery

L - Data originating from a study for which all patients had severe liver disease or transplantation.

Md - Data originating from a study based in a country from the Mediterranean region.

US - Data originating from a study based in the United States of America or Canada

B – VAP diagnosis based on bronchoscopic based methods for sampling.

NS – Not stated

PsVAP - *Pseudomonas* VAP

The control group as published in this study [156] was derived from a previous series by these authors [192].

The control group in one study [160] appears also as the control group in another study by this author [161] and is used only once in the analysis here.

Several (n = 5) of these studies were cited in the following source meta-analyses.

- Vandenbroucke-Grauls CM, Vandenbroucke JP (1991) Effect of selective decontamination of the digestive tract on respiratory tract infections and mortality in the intensive care unit. *Lancet* 338:859-862.
- Hurley JC (1995) Prophylaxis with enteral antibiotics in ventilated patients: Selective decontamination or selective cross-infection? *Antimicrob Agents Chemother* 39:941–947.

Topical polymyxin intervention regimens

1. PTA (=P, topical polymyxin; T, topical tobramycin; A, topical amphotericin).
2. PTA-Ctx (=P, topical polymyxin; T, topical tobramycin; A, topical amphotericin; Ctx, parenteral cephalosporin).
3. P (P = polymyxin either aerosolized or topical)
4. PNeV (P = polymyxin; Ne = Neomycin; V = Vancomycin)
5. PGA-Ctx (=P, topical polymyxin; G, topical gentamicin; A, topical amphotericin; Ctx, parenteral cephalosporin).
6. PTAM (=P, topical polymyxin; T, topical tobramycin; A, topical amphotericin; topical mupirocin).
7. PE (=P, topical polymyxin; E, topical erythromycin)

**Table S4: *Pseudomonas* VAP data: Concurrent control studies of topical PM based methods of VAP prevention <sup>a</sup>**

| author                | Year | Ref      | Notes    | MV % | Patient s (n) | vap_n | PsVAP | PsVAP % |
|-----------------------|------|----------|----------|------|---------------|-------|-------|---------|
| <b>control groups</b> |      |          |          |      |               |       |       |         |
| Abele-Horn            | 1997 | 171      | T,       | 100  | 30            | 20    | 3     | 10.0    |
| Aerdts                | 1991 | 172      |          | 100  | 39            | 27    | 10    | 25.6    |
| Bergmans CC           | 2001 | 154      | B        | 100  | 78            | 24    | 8     | 10.3    |
| Bion                  | 1991 | 173      | L        | 100  | 31            | 8     | 3     | 9.7     |
| Blair                 | 1991 | 174      |          | 93   | 130           | 37    | 9     | 6.9     |
| Bonten CC             | 1994 | 155      | B        | 86   | 21            | 0     | 0     | 0       |
| Cockerill             | 1992 | 175      | US,      | 85   | 75            | 4     | 4     | 5.3     |
| De le Cal             | 2005 | 176      | Burn, Md | 80   | 54            | 26    | 7     | 13      |
| Ferrer                | 1994 | 177      | Md, B    | 100  | 41            | 10    | 4     | 9.8     |
| Hammond               | 1994 | 178      | T        | 100  | 33            | 1     | 0     | 0       |
| Jacobs                | 1992 | 179      |          | 100  | 43            | 4     | 0     | 0       |
| Korinek               | 1993 | 180      | B        | 100  | 60            | 25    | 3     | 5.0     |
| Palomar               | 1997 | 181      | T, Md,   | 100  | 42            | 21    | 6     | 14.3    |
| Pneumatikos           | 2002 | 182      | T, Md,   | 100  | 30            | 16    | 1     | 3.3     |
| Quinio                | 1995 | 183      | T,       | 100  | 72            | 37    | 12    | 16.7    |
| Rocha                 | 1992 | 184      | T, Md,   | 100  | 54            | 25    | 8     | 14.8    |
| Rodriguez_Roldan      | 1990 | 185      | Md,      | 100  | 15            | 11    | 5     | 33.3    |
| Rolando               | 1993 | 186      | L,       | 75   | 31            | 11    | 2     | 6.5     |
| Smith                 | 1993 | 187      | L, US,   | 100  | 18            |       | 1     | 5.6     |
| Stoutenbeek '07       | 2007 | 188      | T,       | 100  | 200           | 46    | 28    | 14.0    |
| Unertl                | 1987 | 189      |          | 100  | 20            | 9     | 2     | 10.0    |
| Verwaest              | 1997 | 190, 193 |          | 100  | 185           | 40    | 7     | 3.8     |
| Wiener                | 1995 | 191      | US, B    | 100  | 31            | 8     | 0     | 0       |
| Winter CC             | 1992 | 162      | B        | 92   | 92            | 17    | 8     | 8.7     |

**Table S4 (continued): *Pseudomonas* VAP data: Concurrent control studies of topical PM based methods of VAP prevention <sup>a</sup>**

| author                     | Year | Ref      | Notes                 | MV % | Patient s (n) | vap_n | PsVAP | PsVAP % |
|----------------------------|------|----------|-----------------------|------|---------------|-------|-------|---------|
| <b>intervention groups</b> |      |          |                       |      |               |       |       |         |
| Abele-Horn                 | 1997 | 171      | T <sup>2</sup>        | 100  | 58            | 13    | 2     | 3.4     |
| Aerdt                      | 1991 | 172      | T <sup>8</sup>        | 100  | 17            | 1     | 0     | 0       |
| Bergmans                   | 2001 | 154      | B <sup>9</sup>        | 100  | 87            | 9     | 3     | 3.4     |
| Bion                       | 1991 | 173      | L <sup>2</sup>        | 100  | 21            | 0     | 0     | 0       |
| Blair                      | 1991 | 174      | <sup>2</sup>          | 93   | 126           | 11    | 1     | 0.8     |
| Bonten TAP                 | 1994 | 155      | B <sup>1</sup>        | 100  | 22            | 0     | 0     | 0       |
| Cockerill                  | 1992 | 175      | US <sup>10</sup>      | 85   | 75            | 3     | 1     | 1.3     |
| De le Cal                  | 2005 | 176      | Burn, Md <sup>2</sup> | 74   | 53            | 18    | 2     | 3.8     |
| Ferrer                     | 1994 | 177      | Md, B <sup>2</sup>    | 100  | 39            | 7     | 1     | 2.6     |
| Hammond                    | 1994 | 178      | T <sup>2</sup>        | 100  | 39            | 6     | 0     | 0       |
| Jacobs                     | 1992 | 179      | <sup>2</sup>          | 100  | 36            | 0.5   | 0     | 0       |
| KoemanChC                  | 2006 | 117      | <sup>11</sup>         | 100  | 128           | 16    | 2     | 1.6     |
| Korinek                    | 1993 | 180      | T, B <sup>12</sup>    | 100  | 63            | 15    | 0     | 0       |
| Palomar_1                  | 1997 | 181      | Md <sup>2</sup>       | 100  | 41            | 7     | 1     | 2.4     |
| Pneumatikos                | 2002 | 182      | T, Md <sup>1</sup>    | 100  | 31            | 5     | 0     | 0       |
| Quinio                     | 1995 | 183      | T <sup>13</sup>       | 100  | 76            | 19    | 5     | 6.6     |
| Rocha                      | 1992 | 184      | T, Md <sup>2</sup>    | 100  | 47            | 7     | 1     | 2.1     |
| Rodriguez_Roldan           | 1990 | 185      | T, Md <sup>14</sup>   | 100  | 13            | 0.5   | 0     | 0       |
| Rolando                    | 1993 | 186      | L <sup>1</sup>        | 75   | 28            | 8     | 1     | 3.6     |
| Smith                      | 1993 | 187      | L, US,                | 100  | 18            |       | 0     | 0       |
| Stoutenbeek '07            | 2007 | 188      | T <sup>2</sup>        | 100  | 201           | 19    | 11    | 5.5     |
| Unertl                     | 1987 | 189      | <sup>13</sup>         | 100  | 19            | 1     | 0     | 0       |
| Verwaest PTA               | 1997 | 190, 193 | <sup>2</sup>          | 100  | 200           | 31    | 10    | 5.0     |
| Wiener                     | 1995 | 191      | US, B <sup>15</sup>   | 100  | 30            | 8     | 2     | 6.7     |
| Winter                     | 1992 | 162      | B <sup>16</sup>       | 92   | 91            | 3     | 3     | 3.3     |

**Table S4 (continued): *Pseudomonas* VAP data: Concurrent control studies of topical PM based methods of VAP prevention <sup>a</sup>**

Footnotes

T – Data originating from a study for which the majority of ICU admission were for trauma

C - Data originating from a study for which the ICU admission were for cardio thoracic surgery

L - Data originating from a study for which all patients had severe liver disease or transplantation.

Md - Data originating from a study based in a country from the Mediterranean region.

US - Data originating from a study based in the United States of America or Canada

B – VAP diagnosis based on bronchoscopic based methods for sampling.

NS – Not stated

PsVAP - *Pseudomonas* VAP

Several (n = 24) of these studies were cited in the following source systematic reviews.

- Liberati A, D'Amico R, Pifferi S, Torri V, Brazzi L, Parmelli E: Antibiotic prophylaxis to reduce respiratory tract infections and mortality in adults receiving intensive care. *Cochrane Database Syst Rev* 2009, 4.
- Pileggi C, Bianco A, Flotta D, Nobile CG, Pavia M. Prevention of ventilator-associated pneumonia, mortality and all intensive care unit acquired infections by topically applied antimicrobial or antiseptic agents: a meta-analysis of randomized controlled trials in intensive care units. *Crit Care* 2011; 15:R155.
- Silvestri L, Van Saene HK, Milanese M, Gregori D. Impact of selective decontamination of the digestive tract on fungal carriage and infection: systematic review of randomized controlled trials. *Intensive Care Med* 2005, 31:898-910.
- Chan EY, Ruest A, Meade MO, Cook DJ. Oral decontamination for prevention of pneumonia in mechanically ventilated adults: systematic review and meta-analysis. *BMJ*. 2007; 334:889–900.

Topical polymyxin intervention regimens

1. PTA (=P, topical polymyxin; T, topical tobramycin; A, topical amphotericin).
2. PTA-Ctx (=P, topical polymyxin; T, topical tobramycin; A, topical amphotericin; Ctx, parenteral cephalosporin).
3. P (P = polymyxin either aerosolized or topical)
4. PNeV (P = polymyxin; Ne = Neomycin; V = Vancomycin)
5. PGA-Ctx (=P, topical polymyxin; G, topical gentamicin; A, topical amphotericin; Ctx, parenteral cephalosporin).
6. PTAM (=P, topical polymyxin; T, topical tobramycin; A, topical amphotericin; topical mupirocin).
7. PE (=P, topical polymyxin; E, topical erythromycin)
8. PNoA-Ctx (=P, topical polymyxin; No, topical norfloxacin; A, topical amphotericin; Ctx, parenteral cephalosporin).
9. PGV (=P, topical polymyxin; G, topical gentamicin; V, topical vancomycin).
10. PGNy-Ctx (=P, topical polymyxin; G, topical gentamicin; Ny, topical nystatin; Ctx, parenteral cephalosporin).
11. P-Ctx (=P, topical polymyxin; Ctx, parenteral cephalosporin).
12. PTAV (=P, topical polymyxin; T, topical tobramycin; A, topical amphotericin; V, topical vancomycin).
13. PGA (=P, topical polymyxin; G, topical gentamicin; A, topical amphotericin).
14. PTNeA (=P, topical polymyxin; T, topical tobramycin; Ne, topical Neomycin; A, topical amphotericin).
15. PGNy (=P, topical polymyxin; G, topical gentamicin; Ny, topical nystatin).
16. PTA-Cz (=P, topical polymyxin; T, topical tobramycin; A, topical amphotericin; Ctx, parenteral Ceftazidime).

## **Details of analytic methods used**

### **Benchmarking: visual**

Caterpillar plots were generated to facilitate a visual benchmark of the VAP and *Pseudomonas* VAP incidence rates and these were generated as follows. The data for VAP and *Pseudomonas* VAP were each logit transformed to generate caterpillar plots using the ‘metan’ command in STATA (release 12.0, STATA Corp., College Station, TX, USA) as previously [S194-S198]. For *Pseudomonas* VAP this transformation proceeds as follows; with the number of mechanically ventilated patients as the denominator (D), the number of patients with *Pseudomonas* VAP as the numerator (N), and R being the *Pseudomonas* VAP proportion (N/D), the logit(*Pseudomonas* VAP) is  $\log(N/(D-N))$  and its variance is  $1/(D*R*(1-R))$ . Note that for any group with a zero event rate (N=0), the addition of the continuity correction (i.e. N+0.5) is required to avoid indeterminate transformations of the logit proportion and its variance. The visual benchmarks are the summary incidences for each of *Pseudomonas* VAP, and VAP as derived using the observational studies. These visual benchmarks were then used in the respective caterpillar plots of the component groups from the VAP prevention studies as a reference line. Dot plots were used to provide an ‘at a glance’ summary of the entire evidence base. These were derived as above for caterpillar plots but without the confidence limits.

Funnel plots were generated using the ‘metafunnel’ command in Stata [S199].

### **Benchmarking: Meta-regression**

Group level regression models of VAP and *Pseudomonas* VAP proportions were developed using generalized estimating equation methods (‘xtgee’ command in STATA). Generalized estimating equation regression models include zero event groups without a need for the continuity correction and also accommodate any intra-cluster correlation. In these regression

models, the predictor variables were the component group membership as follows; membership of a group from an observational study; membership of a control group of a non-concurrent control or concurrent control designed study of polymyxin or a control group of a study of a non-polymyxin intervention; and membership of an intervention group of a non-concurrent control or concurrent control designed study of polymyxin or an intervention group of a study of a non-polymyxin intervention. Additional predictor variables were a group having less than 90% of patients receiving mechanical ventilation, origin from a North American ICU and year of study publication. The category of observational groups acts as the reference (benchmark) category in each model. All factors were entered into the regression models without any pre-selection step.

The regression models were repeated using meta-regression methods using DerSimonian and Laird random effects methods using the 'metareg' command in Stata.



**Table S5: Regression models (Random effect methods) <sup>a</sup>**

| Factor                                              | VAP                      |                 |        | <i>Pseudomonas</i><br>VAP |                |        |
|-----------------------------------------------------|--------------------------|-----------------|--------|---------------------------|----------------|--------|
|                                                     | Coefficient <sup>b</sup> | 95% CI          | p      | Coefficient <sup>b</sup>  | 95% CI         | p      |
| Groups from observational studies (reference group) | -1.2                     | -1.4 to -0.95   | <0.001 | -2.6                      | -2.8 to -2.3   | <0.001 |
| <b>Control groups</b>                               |                          |                 |        |                           |                |        |
| • Non-polymyxin studies                             | +0.05                    | -0.17 to +0.27  | 0.64   | +0.05                     | -0.20 to +0.30 | 0.70   |
| • NCC Topical polymyxin studies;                    | -0.05                    | -0.58 to +0.47  | 0.84   | +0.25                     | -0.32 to +0.82 | 0.38   |
| • CC Topical polymyxin studies;                     | +0.52                    | +0.18 to +0.87  | 0.003  | +0.59                     | +0.21 to +0.97 | 0.002  |
| <b>Intervention groups</b>                          |                          |                 |        |                           |                |        |
| • Non-polymyxin studies                             | -0.39                    | -0.62 to -0.16  | 0.001  | -0.32                     | -0.60 to -0.04 | 0.024  |
| • NCC Topical polymyxin studies;                    | -0.90                    | -1.29 to -0.51  | 0.001  | -1.24                     | -1.72 to -0.77 | 0.001  |
| • CC Topical polymyxin studies;                     | -0.65                    | -1.01 to -0.29  | 0.001  | -0.57                     | -1.02 to -0.12 | 0.014  |
| Trauma ICU <sup>c</sup>                             | +0.55                    | +0.36 to +0.74  | 0.001  | +0.13                     | -0.11 to +0.36 | 0.29   |
| Mode of diagnosis <sup>d</sup>                      | -0.03                    | -0.21 to +0.14  | 0.71   | -0.04                     | -0.24 to +0.16 | 0.68   |
| MV percent <90% <sup>e</sup>                        | -0.40                    | -0.73 to -0.08  | 0.015  | -0.42                     | -0.80 to -0.06 | 0.026  |
| North American study <sup>f</sup>                   | -0.38                    | -0.58 to -0.17  | 0.001  | -0.46                     | -0.69 to -0.22 | 0.008  |
| Year of publication <sup>g</sup>                    | -0.01                    | -0.02 to +0.002 | 0.10   | -0.02                     | -0.03 to -0.01 | 0.02   |

## Footnotes

- Abbreviations; ICU, Intensive care unit; MV; Mechanical ventilation; PM polymyxin; NCC non concurrent control; CC concurrent control.
- Interpretation. For each model the reference group is the observational study (benchmark) groups and this coefficient equals the difference in logits from 0 (a logit equal to 0 equates to a proportion of 50%; a logit equal to -1.4 equates to a proportion of 20%; a logit equal to -2.9

equates to a proportion of 5%) and the other coefficients represent the difference in logits for groups positive for that factor versus the reference group.

- c. Trauma ICU arbitrarily defined as an ICU for which >50% of admissions were for trauma
- d. Diagnosis of VAP using bronchoscopic versus tracheal based sampling
- e. Less than 90% of the group receiving prolonged mechanical ventilation.
- f. Originating from an ICU in The United States of America or Canada
- g. Year of study publication with the coefficient representing the increment for each year post 1985

## References

- S1. A'Court CH, Garrard CS, Crook D, Bowler I, Conlon C, Peto T, Anderson E: Microbiological lung surveillance in mechanically ventilated patients, using non-directed bronchial lavage and quantitative culture. *Q J Med.* 1993;86:635-48.
- S2. Alvarez-Lerma F, ICU-acquired Pneumonia Study Group. Modification of empiric antibiotic treatment in patients with pneumonia acquired in the intensive care unit. *Intens Care Med.* 1996;22(5):387-94.
- S3. Antonelli M, Moro ML, Capelli O, De Blasi RA, D'Errico RR, Conti G, Bufi M, Gasparetto A: Risk factors for early onset pneumonia in trauma patients. *Chest.* 1994;105:224-228
- S4. Apostolopoulou E, Bakakos P, Katostaras T, Gregorakos L: Incidence and risk factors for ventilator-associated pneumonia in 4 multidisciplinary intensive care units in Athens, Greece. *Respir Care.* 2003;48: 681-688.
- S5. Beck-Sague CM, Sinkowitz RL, Chinn RY, Vargo J, Kaler W, Jarvis WR: Risk factors for ventilator-associated pneumonia in surgical intensive-care-unit patients. *Infect Control Hosp Epidemiol.* 1996;17:374-6.
- S6. Bekaert M, Timsit JF, Vansteelandt S, Depuydt P, Vésin A, Garrouste-Orgeas M, Decruyenaere J, Clec'h C, Azoulay E, Benoit D. Attributable mortality of ventilator-associated pneumonia: a reappraisal using causal analysis. *American journal of respiratory and critical care medicine.* 2011;184(10):1133-9.
- S7. Bercault N, Boulain T: Mortality rate attributable to ventilator-associated nosocomial pneumonia in an adult intensive care unit: a prospective case-control study. *Crit Care Med.* 2001;29:2303-2309
- S8. Berrouane Y, Daudenthun I, Riegel B, Emery MN, Martin G, Krivosic R, Grandbastien B. Early onset pneumonia in neurosurgical intensive care unit patients. *J Hosp Infect.* 1998;40(4):275-80.
- S9. Bochicchio GV, Joshi M, Bochicchio K, Tracy K, Scalea TM: A time-dependent analysis of intensive care unit pneumonia in trauma patients. *J Trauma.* 2004;56:296-301.
- S10. Bonten MJ, Gaillard CA, van Tiel FH, Smeets HG, van der Geest S, Stobberingh EE: The stomach is not a source for colonization of the upper respiratory tract and pneumonia in ICU patients. *Chest.* 1994;105(3):878-84.
- S11. Boots RJ, Phillips GE, George N, Faoagali JL: Surveillance culture utility and safety using low-volume blind bronchoalveolar lavage in the diagnosis of ventilator-associated pneumonia. *Respirology.* 2008;13:87-96
- S12. Bornstain C, Azoulay E, De Lassence A, Cohen Y, Costa MA, Mourvillier B, Descorps-Declere A, Garrouste-Orgeas M, Thuong M, Schlemmer B, Timsit JF: Sedation, sucralfate, and antibiotic use are potential means for protection against early-onset ventilator-associated pneumonia. *Clin Infect Dis.* 2004;38(10):1401-8.
- S13. Braun SR, Levin AB, Clark KL. Role of corticosteroids in the development of pneumonia in mechanically ventilated head-trauma victims. *Crit Care Med* 1986;14:198-201
- S14. Bregeon F, Papazian L, Visconti A, Gregoire R, Thirion X, Gouin F: Relationship of microbiologic diagnostic criteria to morbidity and mortality in patients with ventilator-associated pneumonia. *JAMA.* 1997;277: 655-662
- S15. Bronchard R, Albaladejo P, Brezac G, et al. Early onset pneumonia: risk factors and consequences in head trauma patients. *Anesthesiology* 2004;100:234-9.
- S16. Cade JF, McOwat E, Sigamporia R, Keighley C, Presneill J, Sinickas V: Uncertain relevance of gastric colonization in the seriously ill. *Intensive Care Med.* 1992;18:210-217
- S17. Cavalcanti M, Ferrer M, Ferrer R, Morforte R, Garnacho A, Torres A: Risk and prognostic factors of ventilator-associated pneumonia in trauma patients. *Crit Care Med.* 2006;34:1067-1072

- S18. Cendrero JA, Solé-Violán J, Benitez AB, Catalán JN, Fernández JA, Santana PS, de Castro FR: Role of different routes of tracheal colonization in the development of pneumonia in patients receiving mechanical ventilation. *Chest*. 1999;116:462-470
- S19. Chaari A, El Habib M, Ghdhoun H, Algia NB, Chtara K, Hamida CB, Chelly H, Bahloul M, Bouaziz M. Does low-dose hydrocortisone therapy prevent ventilator-associated pneumonia in trauma patients?. *Am J Therap*. 2015;22(1):22-8.
- S20. Chastre J, Trouillet JL, Vuagnat A, Joly-Guillou ML, Clavier H, Dombret MC, Gibert C: Nosocomial pneumonia in patients with acute respiratory distress syndrome. *Am J Respir Crit Care Med*. 1998;157:1165-1172
- S21. Chevret S, Hemmer M, Carlet J: Incidence and risk factors of pneumonia acquired in intensive care units. Results from a multicenter prospective study on 996 patients. European Cooperative Group on Nosocomial Pneumonia. *Intensive Care Med*. 1993;19:256-264
- S22. Cook A, Norwood S, Berne J: Ventilator-associated pneumonia is more common and of less consequence in trauma patients compared with other critically ill patients. *J Trauma Acute Care Surg*. 2010;69(5):1083-91.
- S23. Craven DE, Kunches LM, Lichtenberg DA, Kollisch NR, Barry MA, Heeren TC, McCabe WR: Nosocomial infection and fatality in medical and surgical intensive care unit patients. *Arch Intern Med*. 1988;148:1161-1168
- S24. Daschner F, Kappstein I, Schuster F, Scholz R, Bauer E, Jooßens D, Just H: Influence of disposable ('Conchapak') and reusable humidifying systems on the incidence of ventilation pneumonia. *J Hosp Infect*. 1988;11:161-168
- S25. De Latorre FJ, Pont T, Ferrer A, Rosselló J, Palomar M, Planas M: Pattern of tracheal colonization during mechanical ventilation. *Am J Respir Crit Care Med*. 1995;152:1028-1033
- S26. Ensminger SA, Wright RS, Baddour LM, Afess B: Suspected ventilator-associated pneumonia in cardiac patients admitted to the coronary care unit. *Mayo Clin Proc*. 2006;81:32-35
- S27. Evans HL, Zonies DH, Warner KJ, Bulger EM, Sharar SR, Maier RV, Cuschieri J. Timing of intubation and ventilator-associated pneumonia following injury. *Arch Surg*. 2010;145(11):1041-6.
- S28. Ewig S, Torres A, El-Ebiary M, Fàbregas N, Hernandez C, Gonzalez J, Nicolas JM, Soto L: Bacterial colonization patterns in mechanically ventilated patients with traumatic and medical head injury. Incidence, risk factors, and association with ventilator-associated pneumonia. *Am J Respir Crit Care Med*. 1999;159:188-198
- S29. Fagon JY, Chastre J, Domart Y, Trouillet JL, Pierre J, Darne C, Gibert C: Nosocomial pneumonia in patients receiving continuous mechanical ventilation. Prospective analysis of 52 episodes with use of a protected specimen brush and quantitative culture techniques. *Am Rev Respir Dis* 1989;139:877-884.
- S30. Gacouin A, Barbarot N, Camus C, Salomon S, Isslame S, Marque S, Lavoué S, Donnio PY, Thomas R, Le Tulzo Y. Late-onset ventilator-associated pneumonia in nontrauma intensive care unit patients. *Anesth Analg*. 2009;109(5):1584-90.
- S31. Garrouste-Orgeas M, Chevret S, Arlet G, Marie O, Rouveau M, Popoff N, Schlemmer B: Oropharyngeal or gastric colonization and nosocomial pneumonia in adult intensive care unit patients. A prospective study based on genomic DNA analysis. *Am J Respir Crit Care Med*. 1997;156(5):1647-56.
- S32. George DL, Falk PS, Wunderink RG, Leeper Jr KV, Meduri GU, Steere EL, Glen Mayhall C: Epidemiology of ventilator-acquired pneumonia based on protected bronchoscopic sampling. *Am J Respir Crit Care Med*. 1998;158:1839-1847
- S33. Georges H, Leroy O, Guery B, Alfandari S, Beaucaire G: Predisposing factors for nosocomial pneumonia in patients receiving mechanical ventilation and requiring tracheotomy. *Chest*. 2000;118:767-774.

- S34. Giard M, Lepape A, Allaouchiche B, Guerin C, Lehot JJ, Robert MO, Vanhems P: Early- and late-onset ventilator-associated pneumonia acquired in the intensive care unit: comparison of risk factors. *J Crit Care* 2008, 23:27-33.
- S35. Gruson D, Hilbert G, Vargas F, Valentino R, Bebear C, Allery A, Bebear C, Gbikpi-Benissan GE, Cardinaud JP: Rotation and restricted use of antibiotics in a medical intensive care unit: impact on the incidence of ventilator-associated pneumonia caused by antibiotic-resistant gram-negative bacteria. *Am J Respir Crit Care Med*. 2000, 162(3):837-43.
- S36. Gruson D, Hilbert G, Vargas F, Valentino R, Bui N, Pereyre S, Bebear C, Bebear CM, Gbikpi-Benissan G: Strategy of antibiotic rotation: long-term effect on incidence and susceptibilities of Gram-negative bacilli responsible for ventilator-associated pneumonia. *Crit Care Med*. 2003;31:1908-1914.
- S37. Guérin C, Girard R, Chemorin C, De Varax R, Fournier G: Facial mask noninvasive mechanical ventilation reduces the incidence of nosocomial pneumonia. *Intens care Med*. 1997;23(10):1024-32.
- S38. Heyland DK, Cook DJ, Schoenfeld PS, Frietag A, Varon J, Wood G: The effect of acidified enteral feeds on gastric colonization in critically ill patients: results of a multicenter randomized trial. Canadian Critical Care Trials Group. *Crit Care Med*. 1999;27:2399-2406
- S39. Hortal J, Giannella M, Pérez MJ, Barrio JM, Desco M, Bouza E, Muñoz P. Incidence and risk factors for ventilator-associated pneumonia after major heart surgery. *Intens care med*. 2009;35(9):1518-25.
- S40. Hugonnet S, Uçkay I, Pittet D Staffing level: a determinant of late-onset ventilator-associated pneumonia. *Crit Care*. 2007;11(4):R80
- S41. Hyllienmark P, Brattström O, Larsson E, Martling CR, Petersson J, Oldner A: High incidence of post-injury pneumonia in intensive care-treated trauma patients. *Acta Anaesthesiologica Scandinavica*. 2013;57(7):848-54.
- S42. Ibáñez J, Peñafiel A, Marsé P, Jordá R, Raurich JM, Mata F: Incidence of gastroesophageal reflux and aspiration in mechanically ventilated patients using small-bore nasogastric tubes. *J Parenteral and Enteral Nutrition*. 2000;24(2):103-6.
- S43. Ibrahim EH, Ward S, Sherman G, Kollef MH: A comparative analysis of patients with early-onset vs late-onset nosocomial pneumonia in the ICU setting. *Chest*. 2000;117:1434-1442
- S44. Jaillette E, Nseir S: Relationship between inhaled  $\beta$ 2-agonists and ventilator-associated pneumonia: A cohort study. *Critical Care Med*. 2011;39(4):725-30.
- S45. Jiménez P, Torres A, Rodríguez-Roisin R, de la Bellacasa JP, Aznar R, Gatell JM, Agustí-Vidal A: Incidence and etiology of pneumonia acquired during mechanical ventilation. *Crit Care Med*. 1989;17:882-5.
- S46. Kallel H, Chelly H, Bahloul M, Ksibi H, Dammak H, Chaari A, Hamida CB, Rekik N, Bouaziz M. The effect of ventilator-associated pneumonia on the prognosis of head trauma patients. *J Trauma Acute Care Surg*. 2005;59(3):705-10.
- S47. Kollef MH: Ventilator-associated pneumonia. A multivariate analysis. *JAMA*. 1993;270:1965-70.
- S48. Kollef MH, Silver P, Murphy DM, Trovillion E: The effect of late-onset ventilator-associated pneumonia in determining patient mortality. *Chest*. 1995;108: 1655-62.
- S49. Kollef MH, Von Harz B, Prentice D, Shapiro SD, Silver P, John RS, Trovillion E: Patient transport from intensive care increases the risk of developing ventilator-associated pneumonia. *Chest*. 1997;112(3):765-773.
- S50. Kollef MH, Vlasnik J, Sharpless L, Pasque C, Murphy D, Fraser V: Scheduled change of antibiotic classes: A strategy to decrease the incidence of ventilator-associated pneumonia. *Am J Respir Crit Care Med*. 1997;156:1040-1048

- S51. Kollef MH, Chastre J, Fagon JY, François B, Niederman MS, Rello J, Torres A, Vincent JL, Wunderink RG, Go KW, Rehm C. Global prospective epidemiologic and surveillance study of ventilator-associated pneumonia due to *Pseudomonas aeruginosa*. *Crit care med*. 2014;42(10):2178-87.
- S52. Koss WG, Khalili TM, Lemus JF, Chelly MM, Margulies DR, Shabot MM: Nosocomial pneumonia is not prevented by protective contact isolation in the surgical intensive care unit. *Am Surg*. 2001;67:1140-4.
- S53. Kunac A, Sifri ZC, Mohr AM, Horng H, Lavery RF, Livingston DH: Bacteremia and Ventilator-Associated Pneumonia: A Marker for Contemporaneous Extra-Pulmonic Infection. *Surg Infect*. 2014;15:77-83.
- S54. Lepelletier D, Roquilly A, Mahe PJ, Loutrel O, Champin P, Corvec S, Naux E, Pinaud M, Lejus C, Asehnoune K. Retrospective analysis of the risk factors and pathogens associated with early-onset ventilator-associated pneumonia in surgical-ICU head-trauma patients. *J Neurosurg Anesthesiol*. 2010;22(1):32-7.
- S55. Luyt CE, Guérin V, Combes A, Trouillet JL, Ayed SB, Bernard M, Gibert C, Chastre J: Procalcitonin kinetics as a prognostic marker of ventilator-associated pneumonia. *Am J Respir Crit Care Med*. 2005;171:48-53.
- S56. Magnason S, Kristinsson KG, Stefansson T, Erlendsdottir H, Jonsdottir K, Kristjansson M, Gudmundsson S: Risk factors and outcome in ICU- acquired infections. *Acta Anaesthesiologica Scandinavica*. 2008;52:1238-1245
- S57. Magret M, Amaya-Villar R, Garnacho J, Lisboa T, Diaz E, DeWaele J, Deja M, Manno E, Rello J, EU-VAP/CAP Study Group: Ventilator-associated pneumonia in trauma patients is associated with lower mortality: results from EU-VAP study. *J Trauma Acute Care Surg*. 2010;69(4):849-854.
- S58. Mahul P, Auboyer C, Jospe R, Ros A, Guerin C, el Khouri Z, Galliez M, Dumont A, Gaudin O: Prevention of nosocomial pneumonia in intubated patients respective role of mechanical subglottic secretions drainage and stress ulcer prophylaxis. *Intensive Care Med*. 1992;18:20-25
- S59. Makris D, Manoulakas E, Komnos A, Papakrivou E, Tzovaras N, Hovas A, Zintzaras E, Zakyntinos E. Effect of pravastatin on the frequency of ventilator-associated pneumonia and on intensive care unit mortality: open-label, randomized study. *Crit care med*. 2011;39(11):2440-6.
- S60. Markowicz P, Wolff M, Djedaini K, Cohen Y, Chastre J, Delclaux C: Multicenter prospective study of ventilator-associated pneumonia during acute respiratory distress syndrome. Incidence, prognosis, and risk factors. ARDS Study Group. *Am J Respir Crit Care Med*. 2000;161:1942-8.
- S61. Michel F, Franceschini B, Berger P, Arnal JM, Gainnier M, Sainty JM, Papazian L. Early antibiotic treatment for BAL-confirmed ventilator-associated pneumonia: a role for routine endotracheal aspirate cultures *Chest*. 2005;127(2):589-97.
- S62. Moine P, Timsit JF, De Lassece A, Troché G, Fosse JP, Alberti C, Cohen Y: Mortality associated with late-onset pneumonia in the intensive care unit: results of a multi-center cohort study. *Intensive Care Med*. 2002;28:154-163
- S63. Myny D, Depuydt P, Colardyn F, Blot S: Ventilator-associated pneumonia in a tertiary care ICU analysis of risk factors for acquisition and mortality. *Acta Clin Belg*. 2005;60:114-121.
- S64. Nguile-Makao M, Zahar JR, Français A, Tabah A, Garrouste-Orgeas M, Allaouchiche B, Goldgran-Toledano D, Azoulay E, Adrie C, Jamali S, Clec'h C. Attributable mortality of ventilator-associated pneumonia: respective impact of main characteristics at ICU admission and VAP onset using conditional logistic regression and multi-state models. *Intens care med*. 2010;36(5):781-9.
- S65. Nielsen SL, Røder B, Magnussen P, Engquist A, Frimodt-møller N. Nosocomial pneumonia in an intensive care unit in a Danish university hospital: incidence, mortality and etiology. *Scand J Infect Dis*. 1992;24:65-70.
- S66. Nseir S, Di Pompeo C, Soubrier S, Cavestri B, Jozefowicz E, Saulnier F, Durocher A: Impact of ventilator-associated pneumonia on outcome in patients with COPD. *Chest*. 2005;128(3):1650-1656.

- S67. Papazian L, Bregeon F, Thirion X, Gregoire R, Saux P, Denis JP, Perin G, Charrel J, Dumon JF, Affray JP, Gouin F: Effect of ventilator-associated pneumonia on mortality and morbidity. *Am J Respir Crit Care Med*. 1996;154:91-7.
- S68. Potgieter PD, Linton DM, Oliver S, Forder AA: Nosocomial infections in a respiratory intensive care unit. *Crit Care Med*. 1987;15:495-498
- S69. Raineri E, Crema L, Dal Zoppo S, Acquarolo A, Pan A, Carnevale G, Albertario F, Candiani A. Rotation of antimicrobial therapy in the intensive care unit: impact on incidence of ventilator-associated pneumonia caused by antibiotic-resistant Gram-negative bacteria. *European journal of clinical microbiology & infectious diseases*. 2010;29(8):1015-24.
- S70. Rello J, Quintana E, Ausina V, Castella J, Luquin M, Net A, Prats G: Incidence, etiology, and outcome of nosocomial pneumonia in mechanically ventilated patients. *Chest*. 1991;100:439-444
- S71. Rello J, Ausina V, Castella J, et al Nosocomial respiratory tract infections in multiple trauma patients. Influence of level of consciousness with implications for therapy. *Chest* 1992;102:525-529
- S72. Rello J, Ricart M, Mirelis B, Quintana E, Gurgui M, Net A, Prats, G: Nosocomial bacteremia in a medical-surgical intensive care unit: epidemiologic characteristics and factors influencing mortality in 111 episodes. *Intensive Care Med* 1994;20:94-98.
- S73. Rello J, Sonora R, Jubert P, et al. Pneumonia in intubated patients: role of respiratory airway Care *Am J Respir Crit Care Med* 1996;154:111-5.
- S74. Rello J, Ollendorf DA, Oster G, et al. Epidemiology and outcomes of ventilator-associated pneumonia in a large US database. *Chest* 2002;122:2115-2121
- S75. Reusser P, Zimmerli W, Scheidegger D, Marbet GA, Buser M, Gyr K: Role of gastric colonization in nosocomial infections and endotoxemia: a prospective study in neurosurgical patients on mechanical ventilation. *J Infect Dis*. 1989;160:414-421
- S76. Rincón-Ferrari MD, Flores-Cordero JM, Leal-Noval SR, Murillo-Cabezas F, Cayuelas A, Muñoz-Sánchez MA, Sánchez-Olmedo JI: Impact of ventilator-associated pneumonia in patients with severe head injury. *J Trauma Acute Care Surg*. 2004;57(6):1234-40.
- S77. Rodriguez JL, Gibbons KJ, Bitzer LG, Dechert RE, Steinberg SM, Flint LM: Pneumonia: incidence, risk factors, and outcome in injured patients. *J Trauma*. 1991;31: 907-12.
- S78. Ruiz-Santana S, Garcia Jimenez A, Esteban A, et al. ICU pneumonias: a multi-institutional study. *Crit Care Med*. 1987;15:930-932.
- S79. Salata RA, Lederman MM, Shlaes DM, Jacobs MR, Eckstein E, Tweardy D, Toossi Z, Chmielewski R, Marino J, King CH: Diagnosis of nosocomial pneumonia in intubated, intensive care unit patients. *Am Rev Respir Dis*. 1987;135:426-432
- S80. Shahin J, Bielinski M, Guichon C, Flemming C, Kristof AS Suspected ventilator-associated respiratory infection in severely ill patients: a prospective observational study. *Crit Care* 2013;17(5): R251
- S81. Sofianou DC, Constandinidis TC, Yannacou M, Anastasiou H, Sofianos E: Analysis of risk factors for ventilator-associated pneumonia in a multidisciplinary intensive care unit. *Eur J Clin Microbiol Infect Dis* 2000, 19:460-463.
- S82. Stéphan F, Mabrouk N, Decailliot F, Delclaux C, Legrand P: Ventilator-associated pneumonia leading to acute lung injury after trauma: importance of *Haemophilus influenzae*. *Anesthesiology*. 2006;104: 235-41.
- S83. Tejada Artigas AT, Dronda SB, Vallés EC, Marco JM, Usón MC, Figueras P, Suarez FJ, Hernandez A: Risk factors for nosocomial pneumonia in critically ill trauma patients. *Crit Care Med*. 2001;29:304-9.

- S84. Timsit JF, Chevret S, Valcke J, Misset B, Renaud B, Goldstein FW, Vaury P, Carlet J: Mortality of nosocomial pneumonia in ventilated patients: influence of diagnostic tools. *Am J Respir Crit Care Med*. 1996;154:116-23.
- S85. Torres A, Aznar R, Gatell JM, Jiménez P, González J, Ferrer A, Celis R, Rodriguez-Roisin R: Incidence, risk, and prognosis factors of nosocomial pneumonia in mechanically ventilated patients. *Am Rev Respir Dis*. 1990;142:523-8.
- S86. Trouillet JL, Chastre J, Vuagnat A, Joly-Guillou ML, Combaux D, Dombret MC, Gibert C: Ventilator-associated pneumonia caused by potentially drug-resistant bacteria. *Am J Respir Crit Care Med*. 1998;157(2):531-9.
- S87. Urli T, Perone G, Acquarolo A, Zappa S, Antonini B, Ciani A: Surveillance of infections acquired in intensive care: usefulness in clinical practice. *J Hosp Infect* 2002, 52:130-5.
- S88. Valles J, Pobo A, Garcia-Esquirol O, Mariscal D, Real J, Fernández R. Excess ICU mortality attributable to ventilator-associated pneumonia: the role of early vs late onset. *Intensive care medicine*, 2007;33(8):1363-1368.
- S89. Vanhems P, Bénet T, Voirin N, Januel JM, Lepape A, Allaouchiche B, Argaud L, Chassard D, Guérin C. Early-onset ventilator-associated pneumonia incidence in intensive care units: a surveillance-based study. *BMC Infect Dis*. 2011;11(1):236.
- S90. Verhamme KM, De Coster W, De Roo L, De Beenhouwer H, Nollet G, Verbeke J, Demeyer I, Jordens P: Pathogens in early-onset and late-onset intensive care unit-acquired pneumonia. *Infection Control Hospital Epidemiol*. 2007;28(4):389-397.
- S91. Violan JS, Sanchez-Ramirez C, Mujica AP, Cendrero JC, Fernandez JA, de Castro FR: Impact of nosocomial pneumonia on the outcome of mechanically-ventilated patients. *Crit Care (Lond)*. 1998;2:19-23.
- S92. Woske HJ, Röding T, Schulz I, Lode H: Ventilator-associated pneumonia in a surgical intensive care unit Epidemiology, etiology and comparison of three bronchoscopic methods for microbiological specimen sampling. *Crit Care*. 2001;5:167-173.
- S93. Zahar JR, Nguile-Makao M, Français A, Schwebel C, Garrouste-Orgeas M, Goldgran-Toledano D, Azoulay E, Thuong M, Jamali S, Cohen Y, De Lassence A. Predicting the risk of documented ventilator-associated pneumonia for benchmarking: construction and validation of a score. *Crit care med*. 2009;37(9):2545-51.
- S94. Acosta-Escribano J, Fernández-Vivas M, Carmona TG, Caturla-Such J, Garcia-Martinez M, Menendez-Mainer A, Sanchez-Payá J (2010) Gastric versus transpyloric feeding in severe traumatic brain injury: a prospective, randomized trial. *Intensive Care Med* 36:1532-1539
- S95. Bonten MJ, Gaillard CA, Van der Geest S, Van Tiel FH, Beysens AJ, Smeets HG, Stobberingh EE: The role of intragastric acidity and stress ulcer prophylaxis on colonization and infection in mechanically ventilated ICU patients. A stratified, randomized, double-blind study of sucralfate versus antacids. *Am J Respir Crit Care Med*. 1995;152:1825-1834.
- S96. Boots RJ, Phillips GE, George N, Faoagali JL. Surveillance culture utility and safety using low-volume blind bronchoalveolar lavage in the diagnosis of ventilator-associated pneumonia. *Respirology*. 2008;13:87-96.
- S97. Combes P, Fauvage B, Oleyer C. Nosocomial pneumonia in mechanically ventilated patients, a prospective randomised evaluation of the Stericath closed suctioning system. *Intensive Care Med* 2000;26:878-82.
- S98. Cook D, Guyatt G, Marshall J, et al A comparison of sucralfate and ranitidine for the prevention of upper gastrointestinal bleeding in patients requiring mechanical ventilation. Canadian Critical Care Trials Group. *N Engl J Med* 1998;338:791-797



- S99. Daumal F, Colpart E, Manoury B, Mariani M, Daumal M. Changing heat and moisture exchangers every 48 hours does not increase the incidence of nosocomial pneumonia. *Infection Control & Hospital Epidemiology*. 1999;20(5):347-9.
- S100. Djedaini K, Billiard M, Mier L, Le Bourdelles G, Brun P, Markowicz P, Estagnasie P, Coste F, Boussougant Y, Dreyfuss D: Changing heat and moisture exchangers every 48 hours rather than 24 hours does not affect their efficacy and the incidence of nosocomial pneumonia. *Am J Respir Crit Care Med*. 1995;152(5):1562-9.
- S101. Drakulovic MB, Torres A, Bauer TT, Nicolas JM, Nogué S, Ferrer M: Supine body position as a risk factor for nosocomial pneumonia in mechanically ventilated patients: a randomised trial. *Lancet*. 1999;354(9193):1851-1858
- S102. Dreyfuss D, Djedaini K, Weber P, Brun P, Lanore JJ, Rahmani J, Coste F: Prospective study of nosocomial pneumonia and of patient and circuit colonization during mechanical ventilation with circuit changes every 48 hours versus no change. *Am Rev Respir Dis*. 1991;143(4 Pt 1), 738-743.
- S103. Dreyfuss D, Djedaini K, Gros I, Mier L, Le Bourdellés G, Cohen Y, Estagnasié P, Coste F, Boussougant Y: Mechanical ventilation with heated humidifiers or heat and moisture exchangers: effects on patient colonization and incidence of nosocomial pneumonia. *Am J Respir Crit Care Med*. 1995;151:986-92.
- S104. Driks MR, Craven DE, Celli BR, et al (1987) Nosocomial pneumonia in intubated patients given sucralfate as compared with antacids or histamine type 2 blockers. The role of gastric colonization. *N Engl J Med* 317:1376-1382
- S105. Fabian TC, Boucher BA, Croce MA, Kuhl DA, Janning SW, Coffey BC, Kudsk KA: Pneumonia and stress ulceration in severely injured patients: a prospective evaluation of the effects of stress ulcer prophylaxis. *Arch Surg*. 1993;128(2):185-92.
- S106. Forestier C, Guelon D, Cluytens V, Guillart T, Sirot J, De champs C: Oral probiotic and prevention of *Pseudomonas aeruginosa* infections: a randomized, double-blind, placebocontrolled pilot study in intensive care unit patients. *Crit Care* 2008;12:R69.
- S107. Fourrier FE, Cau-Pottier H, Boutigny M, Roussel-Delvallez M, Jourdain, Chopin C: Effects of dental plaque antiseptic decontamination on bacterial colonization and nosocomial infections in critically ill patients. *Intensive Care Med*. 2000;26:1239-1247
- S108. Fourrier F, Dubois D, Pronnier P, Herbecq P, Leroy O, Desmettre T, Roussel-Delvallez M: Effect of gingival and dental plaque antiseptic decontamination on nosocomial infections acquired in the intensive care unit a double-blind placebo-controlled multicenter study. *Crit Care Med*. 2005;33:1728-1735
- S109. Genuit T, Bochicchio G, Napolitano LM, McCarter RJ, Roghman MC. Prophylactic chlorhexidine oral rinse decreases ventilator-associated pneumonia in surgical ICU patients. *Surg Infect (Larchmt)*. 2001;2:5-18.
- S110. Heyland DK, Cook DJ, Schoenfeld PS, Freitag A, Varon J, Wood G The effect of acidified enteral feeds on gastric colonization in critically ill patients: results of a multicenter randomized trial. Canadian Critical Care Trials Group. *Crit Care Med* 1999;27:2399-2406
- S111. Holzapfel L, Chevret S, Madinier G, Ohen F, Demingeon G, Coupry A, Chaudet M: Influence of long-term oro- or nasotracheal intubation on nosocomial maxillary sinusitis and pneumonia: results of a prospective, randomized, clinical trial. *Crit Care Med*. 1993;21:1132-1138
- S112. Holzapfel L, Chastang C, Demingeon G, Bohe J, Piralla B, Coupry A: A randomized study assessing the systematic search for maxillary sinusitis in nasotracheally mechanically ventilated patients. Influence of nosocomial maxillary sinusitis on the occurrence of ventilator-associated pneumonia. *Am J Respir Crit Care Med*. 1999;159:695-701

- S113. Kantorova I, Svoboda P, Scheer P, Doubek J, Rehorkova D, Bosakova H, Ochmann J. Stress ulcer prophylaxis in critically ill patients: a randomized controlled trial. *Hepato-gastroenterology*, 2004;51:757-761.
- S114. Kirschenbaum L, Azzi E, Sfeir T, et al. Effect of continuous lateral rotational therapy on the prevalence of ventilator-associated pneumonia in patients requiring long-term ventilatory care *Crit Care Med* 2002;30:1983-6.
- S115. Kirton OC, DeHaven B, Morgan J, et al. A prospective, randomized comparison of an in-line heat moisture exchange filter and heated wire humidifiers: rates of ventilator-associated early-onset (community-acquired) or late-onset (hospital-acquired) pneumonia and incidence of endotracheal tube occlusion. *Chest* 1997;112:1055-9.
- S116. Knight DJ, Gardiner D, Banks A, Snape SE, Weston VC, Bengmark S, Girling KJ: Effect of synbiotic therapy on the incidence of ventilator associated pneumonia in critically ill patients: a randomised, double-blind, placebo-controlled trial. *Intensive Care Med*. 2009;35:854-861.
- S117. Koeman M, van der Ven AJ, Hak E, et al. Oral decontamination with chlorhexidine reduces the incidence of ventilator-associated pneumonia. *Am J Respir Crit Care Med* 2006;173:1348-1355
- S118. Kollef MH, Shapiro SD, Fraser VJ, Silver P, Murphy DM, Trovillion E, Hearn ML, Richards RD, Cracchilo L, Hossin L: Mechanical ventilation with or without 7-day circuit changes. A randomized controlled trial. *Ann Intern Med*.1995;123:168-174
- S119. Kollef MH, Afessa B, Anzueto A, Veremakis C, Kerr KM, Margolis BD, Schinner R: Silver-coated endotracheal tubes and incidence of ventilator-associated pneumonia: the NASCENT randomized trial. *JAMA*. 2008;300(7):805-813
- S120. Kortbeek JB, Haigh PI, Doig C. Duodenal versus gastric feeding in ventilated blunt trauma patients: a randomized controlled trial. *J Trauma* 1999;46:992-6.
- S121. Kostadima E, Kaditis AG, Alexopoulos EI, Zakyntinos E, Sfyas D. Early gastrostomy reduces the rate of ventilator-associated pneumonia in stroke or head injury patients. *Eur Respir J*. 2005;26(1):106-11.
- S122. Lacherade JC, Auburtin M, Cerf C, Van de Louw A, Soufir L, Rebufat Y, Rezaiguia S, Ricard JD, Lellouche F, Brun-Buisson C, Brochard L: Impact of humidification systems on ventilator-associated pneumonia: a randomized multicenter trial. *Am J Respir Crit Care Med*. 2005;172:1276-1282
- S123. Lacherade JC, De Jonghe B, Guezennec P, Debbat K, Hayon J, Monsel A, Bastuji-Garin S: Intermittent subglottic secretion drainage and ventilator-associated pneumonia A multicenter trial. *Am J Respir Crit Care Med*. 2010;182:910-917.
- S124. Laggner AN, Lenz K, Base W, Druml W, Schneeweiss B, Grimm G: Prevention of upper gastrointestinal bleeding in long-term ventilated patients. Sucralfate versus ranitidine. *Am J Med*. 1989;86:81-4.
- S125. Launey Y, Nesseler N, Le Cousin A, Feuillet F, Garlantezec R, Mallédant Y, Seguin P: Effect of a fever control protocol-based strategy on ventilator-associated pneumonia in severely brain-injured patients. *Crit Care*. 2014;18(6):1.
- S126. Lorente L, Lecuona M, Málaga J, Revert C, Mora ML, Sierra A: Bacterial filters in respiratory circuits: an unnecessary cost? *Crit Care Med* 2003;31:2126-2130
- S127. Lorente L, Lecuona M, Galván R, Ramos MJ, Mora ML, Sierra A: Periodically changing ventilator circuits is not necessary to prevent ventilator-associated pneumonia when a heat and moisture exchanger is used. *Infect Control Hosp Epidemiol*. 2004;25:1077-1082
- S128. Lorente L, Lecuona M, Martín MM, García C, Mora ML, Sierra A: Ventilator-associated pneumonia using a closed versus an open tracheal suction system. *Crit Care Med*. 2005;33:115-119

- S129. Lorente L, Lecuona M, Jiménez A, Mora ML, Sierra A: Tracheal suction by closed system without daily change versus open system. *Intensive Care Med.* 2006;32:538-44.
- S130. Lorente L, Lecuona M, Jimenez A, Mora ML, Sierra A: Ventilator-associated pneumonia using a heated humidifier or a heat and moisture exchanger: a randomized controlled trial [ISRCTN88724583]. *Crit Care* 2006;10:R116
- S131. Lorente L, Lecuona M, Jimenez A, Mora ML, Sierra: Influence of an endotracheal tube with polyurethane cuff and subglottic secretion drainage on pneumonia. *Am J Respir Crit Care Med.* 2007;176:1079-1083
- S132. Lorente L, Lecuona M, Jiménez A, Palmero S, Pastor E, Lafuente N, Ramos MJ, Mora ML, Sierra A: Ventilator-associated pneumonia with or without toothbrushing a randomized controlled trial. *Eur J Clin Microbiol Infect Dis.* 2012;31:1-9
- S133. Lorente L, Lecuona M, Jiménez A, Lorenzo L, Roca I, Cabrera J, Llanos C, Mora ML: Continuous endotracheal tube cuff pressure control system protects against ventilator-associated pneumonia. *Crit Care.* 2014;18(2):1.
- S134. Manzano F, Fernandez-Mondejar E, Colmenero M, Poyatos ME, Rivera R, Machado J, Catalan I, Artigas A: Positive-end expiratory pressure reduces incidence of ventilator-associated pneumonia in nonhypoxemic patients. *Crit Care Med.* 2008;36(8):2225-31.
- S135. Martin C, Perrin G, Gevaudan MJ, Saux P, Gouin F. Heat and moisture exchangers and vaporizing humidifiers in the intensive care unit. *Chest.* 1990;97(1):144-9.
- S136. Morrow LE, Kollef MH, Casale TB: Probiotic prophylaxis of ventilator-associated pneumonia: a blinded, randomized, controlled trial. *Am J Respir Crit Care Med.* 2010;182:1058-1064
- S137. Nseir S, Zerimech F, Fournier C, Lubret R, Ramon P, Durocher A, Balduyck M: Continuous control of tracheal cuff pressure and microaspiration of gastric contents in critically ill patients. *Am J Respir Crit Care Med.* 2011;184(9):1041-7.
- S138. Pickworth KK, Falcone RE, Hoogeboom JE, et al Occurrence of nosocomial pneumonia in mechanically ventilated trauma patients: a comparison of sucralfate and ranitidine. *Crit Care Med* 1993;21:1856-1862
- S139. Pneumatikos I, Konstantonis D, Tsagaris I, Theodorou V, Vretzakis G, Danielides V, Bouros D: Prevention of nosocomial maxillary sinusitis in the ICU: the effects of topically applied alpha-adrenergic agonists and corticosteroids. *Intensive Care Med.* 2006;32:532-537
- S140. Prod'hom G, Leuenberger P, Koerfer J, Blum A, Chiolero R, Schaller MD, Perret C, Spinnler O, Blondel J, Siegrist H, Saghafi L: Nosocomial pneumonia in mechanically ventilated patients receiving antacid, ranitidine, or sucralfate as prophylaxis for stress ulcer. A randomized controlled trial. *Ann Intern Med.* 1994;120:653-62.
- S141. Reignier J, Mercier E, Le Gouge A, Boulain T, Desachy A, Bellec F, Lascarrou JB: Effect of Not Monitoring Residual Gastric Volume on Risk of Ventilator-Associated Pneumonia in Adults Receiving Mechanical Ventilation and Early Enteral Feeding. A Randomized Controlled Trial. *JAMA* 2013, 309:249-256.
- S142. Rumbak MJ, Truncale T, Newton MN, Adams B, Hazard P. A Prospective, Randomized Study Comparing Early Versus Delayed Percutaneous Tracheostomy In Critically Ill Medical Patients Requiring Prolonged Mechanical Ventilation. *Chest.* 2000;118(4):97S-8S.
- S143. Ryan P, Dawson J, Teres D, Celoria G, Navab F: Nosocomial pneumonia during stress ulcer prophylaxis with cimetidine and sucralfate. *Arch Surg.* 1993;128(12):1353-7.
- S144. Seguin P, Tanguy M, Laviolle B, Tirel O, Malledant Y: Effect of oropharyngeal decontamination by povidone-iodine on ventilator-associated pneumonia in patients with head trauma. *Crit Care Med* 2006, 34:1514-1519.

- S145. Seguin P, Laviolle B, Dahyot-Fizelier C, Dumont R, Veber B, Gergaud S, Asehnoune K, Mimoz O, Donnio PY, Bellissant E, Malledant Y. Effect of oropharyngeal povidone-iodine preventive oral care on ventilator-associated pneumonia in severely brain-injured or cerebral hemorrhage patients: a multicenter, randomized controlled trial. *Crit care med.* 2014;42(1):1-8.
- S146. Smulders K, van der Hoeven H, Weers-Pothoff I, Vandenbroucke-Grauls C A randomized clinical trial of intermittent subglottic secretion drainage in patients receiving mechanical ventilation. *Chest* 2002;121:858-862
- S147. Staudinger T, Bojic A, Holzinger U, Meyer B, Rohwer M, Mallner F, Locker GJ Continuous lateral rotation therapy to prevent ventilator-associated pneumonia *Crit Care Med* 2010;38(2):486-490
- S148. Swan JT, Ashton CM, Bui LN, Pham VP, Shirkey BA, Blackshear JE, Bersamin JB, Pomer RM, Johnson ML, Magtoto AD, Butler MO. Effect of chlorhexidine bathing every other day on prevention of hospital-acquired infections in the surgical ICU: a single-center, randomized controlled trial. *Crit Care Med.* 2016;44(10):1822-32.
- S149. Thomachot L, Viviani X, Arnaud S, Boisson C, Martin CD: Comparing two heat and moisture exchangers, one hydrophobic and one hygroscopic, on humidifying efficacy and the rate of nosocomial pneumonia. *Chest.* 1998;114:1383-1389
- S150. Thomachot L, Leone M, Razzouk K, Antonini F, Vialet R, Martin C: Do the components of heat and moisture exchanger filters affect humidifying efficacy and the incidence of nosocomial pneumonia? *Crit Care Med.* 1999;27:923-928
- S151. Thomachot L, Leone M, Razzouk K, Antonini F, Vialet R, Martin C: Randomized Clinical Trial of Extended Use of a Hydrophobic Condenser Humidifier: 1 vs 7 Days. *Crit Care Med.* 2002;30:232-7
- S152. Valencia M, Ferrer M, Farre R, Navajas D, Badia JR, Nicolas JM, Torres A: Automatic control of tracheal tube cuff pressure in ventilated patients in semirecumbent position: a randomized trial. *Crit Care Med.* 2007;35: 1543-9.
- S153. Valles J, Artigas A, Rello J, et al. Continuous aspiration of subglottic secretions in preventing ventilator-associated pneumonia. *Ann Intern Med* 1995;122:179-86.
- S154. Bergmans DC, Bonten MJ, Gaillard CA, et al Prevention of ventilator-associated pneumonia by oral decontamination: a prospective, randomized, double-blind, placebo-controlled study. *Am J Respir Crit Care Med* 2001;164:382-388
- S155. Bonten MJ, Gaillard CA, Johanson Jr WG, Van Tiel FH, Smeets HG, Van Der Geest S, Stobberingh EE. Colonization in patients receiving and not receiving topical antimicrobial prophylaxis. *Am J Respir Crit Care Med* 1994;150(5):1332-1340.
- S156. Feeley TW, Du Moulin GC, Hedley-Whyte J, Bushnell LS, Gilbert JP, Feingold DS. Aerosol polymyxin and pneumonia in seriously ill patients. *New Engl J Med.* 1975;293(10):471-5.
- S157. Godard J, Guillaume C, Reverdy ME, Bachmann P, Bui-Xuan B, Nageotte A, Motin J: Intestinal decontamination in a polyvalent ICU. A double-blind study. *Intensive Care Med* 1990, 16:307-311.
- S158. Klick JM, Du Moulin GC, Hedley-Whyte J, Teres D, Bushnell LS, Feingold DS. Prevention of gram-negative bacillary pneumonia using polymyxin aerosol as prophylaxis. II. Effect on the incidence of pneumonia in seriously ill patients. *J Clin Invest.* 1975;55(3):514-9.
- S159. Konrad F, Schwalbe B, Heeg K, et al. [Frequency of colonization and pneumonia and development of resistance in long-term ventilated intensive-care patients subjected to selective decontamination of the digestive tract]. *Anaesthetist* 1989;38:99-109.
- S160. Stoutenbeek CP, Van Saene HK, Miranda DR, Zandstra DF. The effect of selective decontamination of the digestive tract on colonisation and infection rate in multiple trauma patients. *Intens Care Med.* 1984;10(4):185-92.

- S161. Stoutenbeek CP, van Saene HK, Miranda DR, Zandstra DF, Langrehr D; The effect of oropharyngeal decontamination using topical nonabsorbable antibiotics on the incidence of nosocomial respiratory tract infections in multiple trauma patients. *J Trauma* 1987;27:357-364
- S162. Winter R, Humphreys H, Pick A, MacGowan AP, Willatts SM, Speller DC: A controlled trial of selective decontamination of the digestive tract in intensive care and its effect on nosocomial infection. *J Antimicrob Chemother.* 1992;30:73-87
- S163. Bos LD, Stips C, Schouten LR, van Vught LA, Wiewel MA, Wieske L, van Hooijdonk RT, Straat M, de Beer FM, Glas GJ, Visser CE. Selective decontamination of the digestive tract halves the prevalence of ventilator-associated pneumonia compared to selective oral decontamination. *Intensive Care Med.* 2017;43(10):1535-7.
- S164. Garbino J, Lew DP, Romand JA, Hugonnet S, Auckenthaler R, Pittet D: Prevention of severe *Candida* infections in nonneutropenic, high-risk, critically ill patients: a randomized, double-blind, placebo-controlled trial in patients treated by selective digestive decontamination. *Intensive Care Med* 2002;28:1708-1717
- S165. Leone M, Bourgoin A, Giuly E, et al. Influence on outcome of ventilator-associated pneumonia in multiple trauma patients with head trauma treated with selected digestive decontamination. *Crit Care Med* 2002; 30:1741-6.
- S166. Nardi G, Di Silvestre A, De Monte A, Massarutti D, Proietti A, Troncon MG, Zussino M: Reduction in gram-positive pneumonia and antibiotic consumption following the use of a SDD protocol including nasal and oral mupirocin. *Eur J Emerg Med* 2001;8:203-214
- S167. Rouby JJ, Poete P, de Lassale EM, Nicolas MH, Bodin L, Jarlier V, Korinek AM, Viars P. Prevention of Gram negative nosocomial bronchopneumonia by intratracheal colistin in critically ill patients. *Intensive Care Med.* 1994;20(3):187-92.
- S168. Silvestri L, Sarginson RE, Hughes J, Milanese M. Most nosocomial pneumonias are not due to nosocomial bacteria in ventilated patients. Evaluation of the accuracy of the 48 h time cut-off using carriage as the gold standard. *Anaesth Intens care.* 2002;30(3):275.
- S169. Silvestri L, Bragadin CM, Milanese M, Gregori D, Consales C, Gullo A, Van Saene HK. Are most ICU infections really nosocomial? A prospective observational cohort study in mechanically ventilated patients. *J Hosp Infect.* 1999;42(2):125-33.
- S170. Veelo DP, Bulut T, Dongelmans DA, et al. The incidence and microbial spectrum of ventilator-associated pneumonia after tracheotomy in a selective decontamination of the digestive tract-setting. *J Infect* 2008; 56:20-6.
- S171. Abele-Horn M, Dauber A, Bauernfeind A, Russwurm W, Seyfarth-Metzger I, Gleich P, Ruckdeschel G: Decrease in nosocomial pneumonia in ventilated patients by selective oropharyngeal decontamination (SOD). *Intensive Care Med.* 1997;23:187-95.
- S172. Aerdt SJ, van Dalen R, Clasener HA, Festen J, van Lier HJ, Vollaard EJ: Antibiotic prophylaxis of respiratory tract infection in mechanically ventilated patients. A prospective, blinded, randomized trial of the effect of a novel regimen. *Chest.* 1991;100:783-791
- S173. Bion JF, Badger I, Crosby HA, Hutchings P, Kong KL, Baker J, Hutton P, McMaster P, Buckels JA, Elliott TSJ: Selective decontamination of the digestive tract reduces gram-negative pulmonary colonization but not systemic endotoxemia in patients undergoing elective liver transplantation. *Crit Care Med.* 1994;22:40-49
- S174. Blair P, Rowlands BJ, Lowry K, Webb H, Armstrong P, Smilie J Selective decontamination of the digestive tract: a stratified, randomized, prospective study in a mixed intensive care unit. *Surgery* 1991;110:303-309
- S175. Cockerill FR, 3rd, Muller SR, Anhalt JP, et al. Prevention of infection in critically ill patients by selective decontamination of the digestive tract. *Ann Intern Med* 1992;117:545-53.

- S176. de La Cal MA, Cerdá E, Garcia-Hierro P, Van Saene HK, Gómez-Santos D, Negro E & Lorente JA. Survival benefit in critically ill burned patients receiving selective decontamination of the digestive tract: a randomized, placebocontrolled, double-blind trial. *Ann Surg.* 2005;241:424-30.
- S177. Ferrer M, Torres A, Gonzalez J, Puig de la Bellacasa J, el-Ebiary M, Roca M, Gatell JM, Rodriguez-Roisin R: Utility of selective digestive decontamination in mechanically ventilated patients. *Ann Intern Med.* 1994;120:389-395
- S178. Hammond JM, Potgieter PD, Saunders LG. Selective decontamination of the digestive tract in multiple trauma patients-Is there a role? Results of a prospective, double-blind, randomized trial. *Crit Care Med.* 1994;22(1):33-9.
- S179. Jacobs S, Foweraker JE, Roberts SE: Effectiveness of selective decontamination of the digestive tract (SDD) in an ICU with a policy encouraging a low gastric pH. *Clin Intensive Med.* 1992;3:52-58
- S180. Korinek AM, Laisne MJ, Nicolas MH, Raskine L, Deroin V, Sanson-lepors MJ: Selective decontamination of the digestive tract in neurosurgical intensive care unit patients: a double-blind, randomized, placebo-controlled study. *Crit Care Med.* 1993;21:1466-73.
- S181. Palomar M, Alvarez-Lerma F, Jorda R, Bermejo B, Catalan Study Group of Nosocomial Pneumonia Prevention: Prevention of nosocomial infection in mechanically ventilated patients: selective digestive decontamination versus sucralfate. *Clin Intens Care.* 1997;8:228-235
- S182. Pneumatikos I, Koulouras V, Nathanail C, Goe D, Nakos G: Selective decontamination of subglottic area in mechanically ventilated patients with multiple trauma. *Intensive Care Med.* 2002;28:432-437
- S183. Quinio B, Albanese J, Bues-Charbit M, Viviani X, Martin C; Selective decontamination of the digestive tract in multiple trauma patients. A prospective double-blind, randomized, placebo-controlled study. *Chest* 1996;109:765-772
- S184. Rocha LA, Martin MJ, Pita S, Paz J, Seco C, Margusino L, Villanueva R, Duran MT: Prevention of nosocomial infection in critically ill patients by selective decontamination of the digestive tract. A randomized, double blind, placebo-controlled study. *Intensive Care Med.* 1992;18:398-404
- S185. Rodríguez-Roldán JM, Altuna-Cuesta A, López A, Carrillo A, Garcia J, León J, Martínez-Pellús AJ: Prevention of nosocomial lung infection in ventilated patients: use of an antimicrobial pharyngeal nonabsorbable paste. *Crit Care Med.* 1990;18:1239-42
- S186. Rolando N, Gimson A, Wade J, Philpott- Howard J, Casewell M, Williams R: Prospective controlled trial of selective parenteral and enteral antimicrobial regimen in fulminant liver failure. *Hepatology.* 1993;17:196-201
- S187. Smith SD, Jackson RJ, Hannakan CJ, Wadowsky RM, Tzakis AG, Rowe MI; Selective decontamination in pediatric liver transplants. *Transplantation* 1993;55:1306-1308
- S188. Stoutenbeek CP, van Saene HKF, Little RA, Whitehead A: The effect of selective decontamination of the digestive tract on mortality in multiple trauma patients: a multicenter randomized controlled trial. *Intensive Care Med.* 2007;33:261-270
- S189. Unertl K, Ruckdeschel G, Selbmann HK, et al; Prevention of colonization and respiratory infections in long-term ventilated patients by local antimicrobial prophylaxis. *Intensive Care Med* 1987;13:106-113
- S190. Verwaest C, Verhaegen J, Ferdinande P, Schetz M, Van den Berghe G, Verbist L, Lauwers P: Randomized, controlled trial of selective digestive decontamination in 600 mechanically ventilated patients in a multidisciplinary intensive care unit. *Crit Care Med.* 1997;25:63-71
- S191. Wiener J, Itokazu G, Nathan C, Kabins SA, Weinstein RA: A randomized, double-blind, placebo-controlled trial of selective digestive decontamination in a medical-surgical intensive care unit. *Clin Infect Dis.* 1995;20:861-867

- S192. Stevens RM, Teres D, Skillman JJ, Feingold DS. Pneumonia in an intensive care unit: a 30-month experience. *Arch Inter Med.* 1974;134(1):106-11.
- S193. Verhaegen J: Randomized study of selective digestive decontamination on colonization and prevention of infection in mechanically ventilated patients in the ICU. 1992. Doctor in Medical Sciences – thesis, University Hospital, Leuven, Belgium.
- S194. Hurley JC: ICU-acquired candidemia within selective digestive decontamination studies: a meta-analysis. *Intensive Care Med.* 2015;41(11):1877-85.
- S195. Hurley JC: Topical antibiotics as a major contextual hazard toward bacteremia within selective digestive decontamination studies: a meta-analysis. *BMC Infect Dis.* 2014;14(1):1.
- S196. Harris RJ, Bradburn MJ, Deeks JJ, Harbord RM, Altmann DG, Sterne JAC: Meta: fixed and random effects-meta-analysis. *Stata J.* 2008;8:3–28.
- S197. Harbord RM, Higgins JPT: Meta-regression in Stata. *Stata J.* 2008;8:493–519.
- S198. Higgins JP, Thompson SG, Spiegelhalter DJ: A re-evaluation of random-effects meta-analysis. *J R Stat Soc A.* 2009;172:137–159.
- S199. Sterne JAC, Egger M. 2001. Funnel plots for detecting bias in meta-analysis: guidelines on choice of axis. *J Clin Epidemiol* 54: 1046-1055.

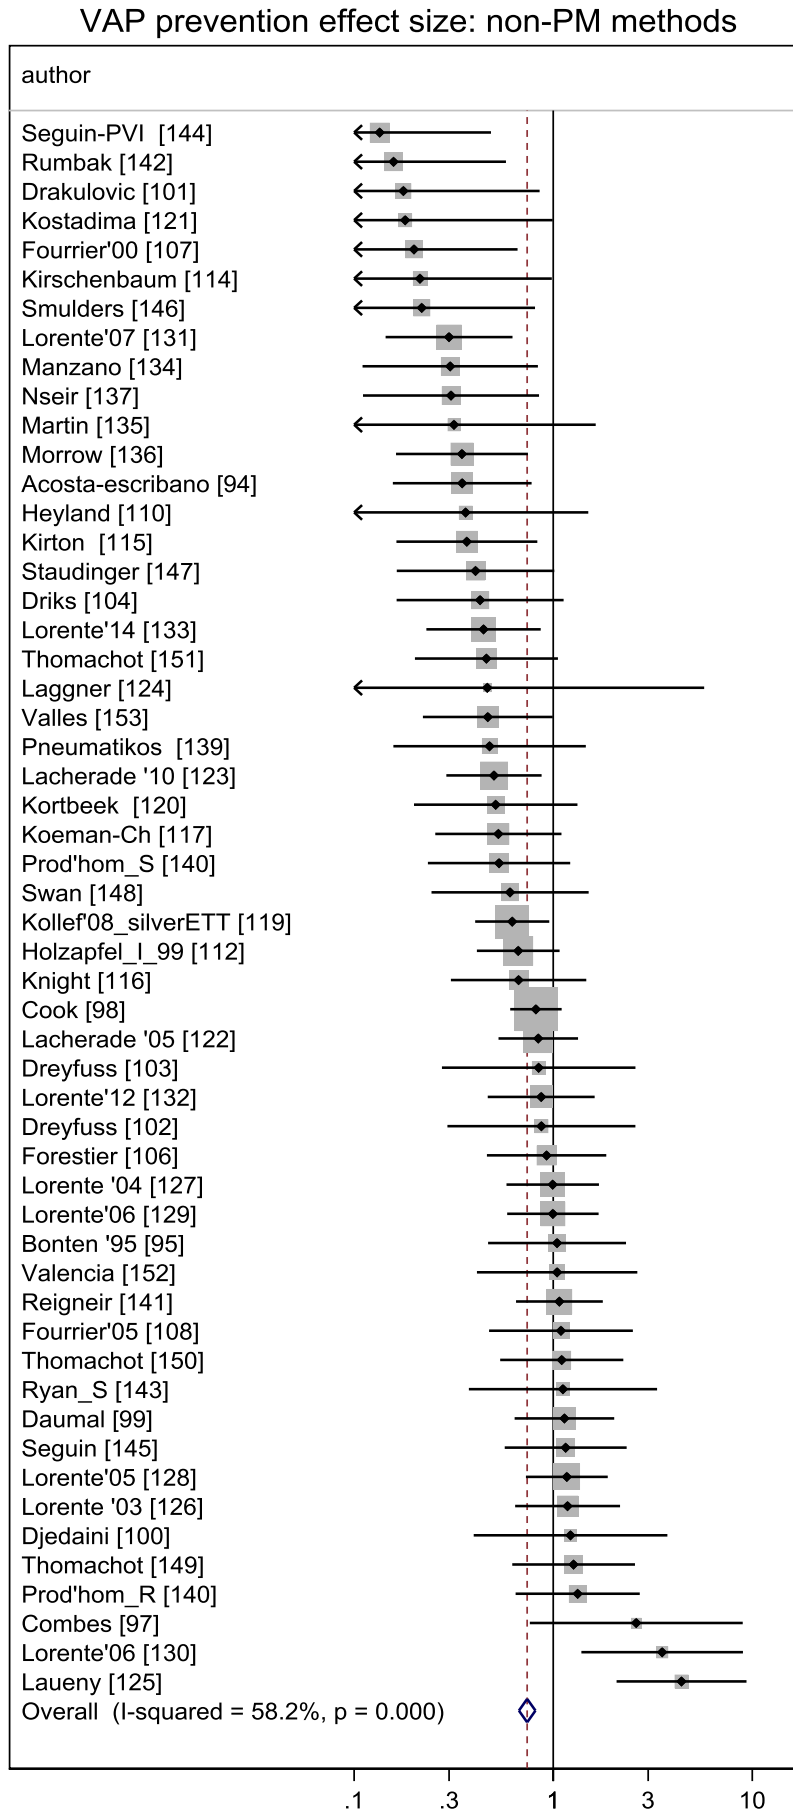

Fig S1

Caterpillar plots of the group specific (small squares) and summary (large open diamond, broken vertical line) effect size on the overall VAP incidence and 95 % CI among studies of non-PM methods of VAP prevention based methods of VAP prevention. Studies are listed in Table S2.



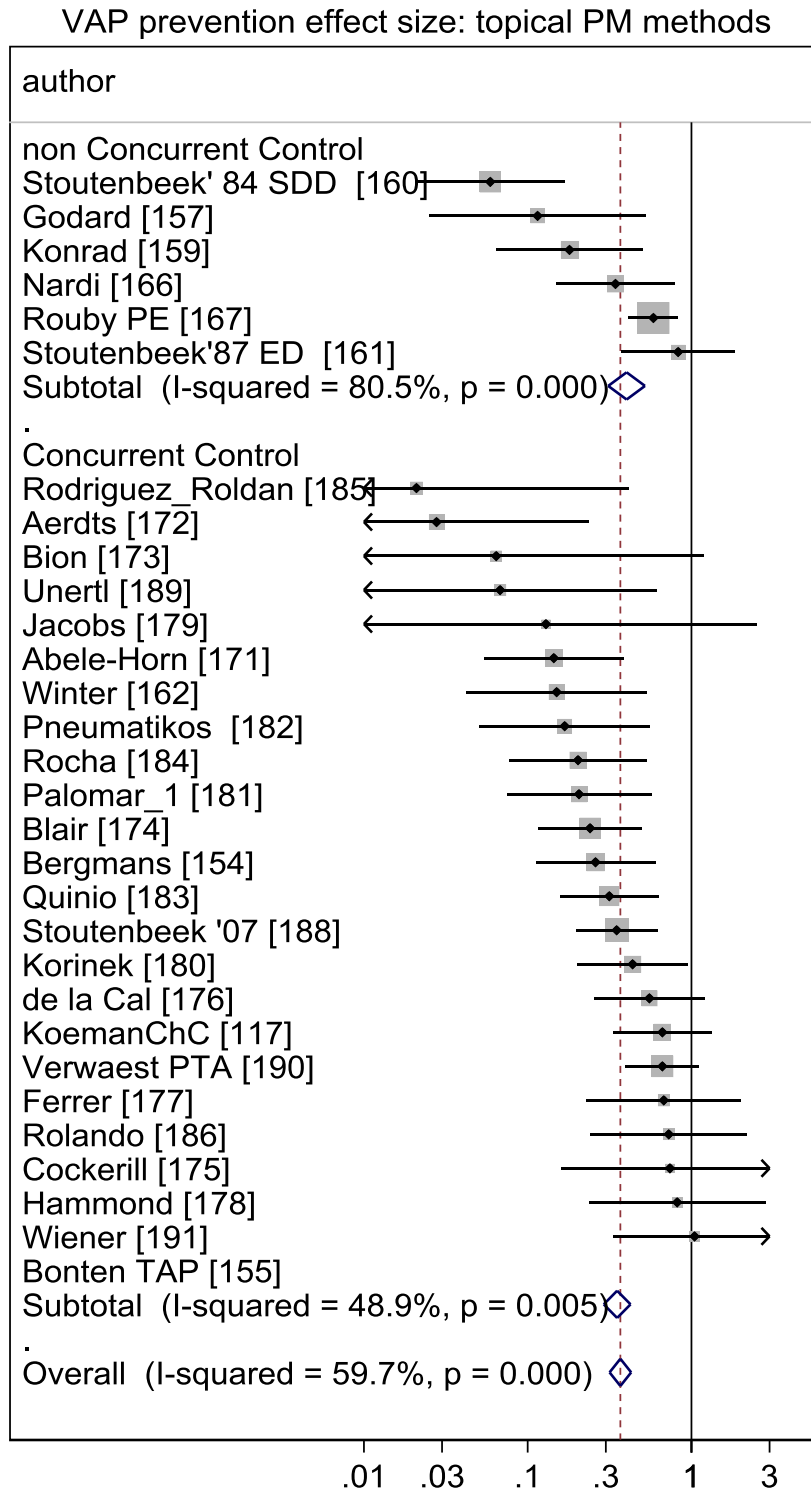

Fig S2

Caterpillar plots of the group specific (small squares) and summary (large open diamond, broken vertical line) effect size on the overall VAP incidence and 95 % CI among studies of topical PM based methods of VAP prevention. Studies are listed in Table S3 & S4.

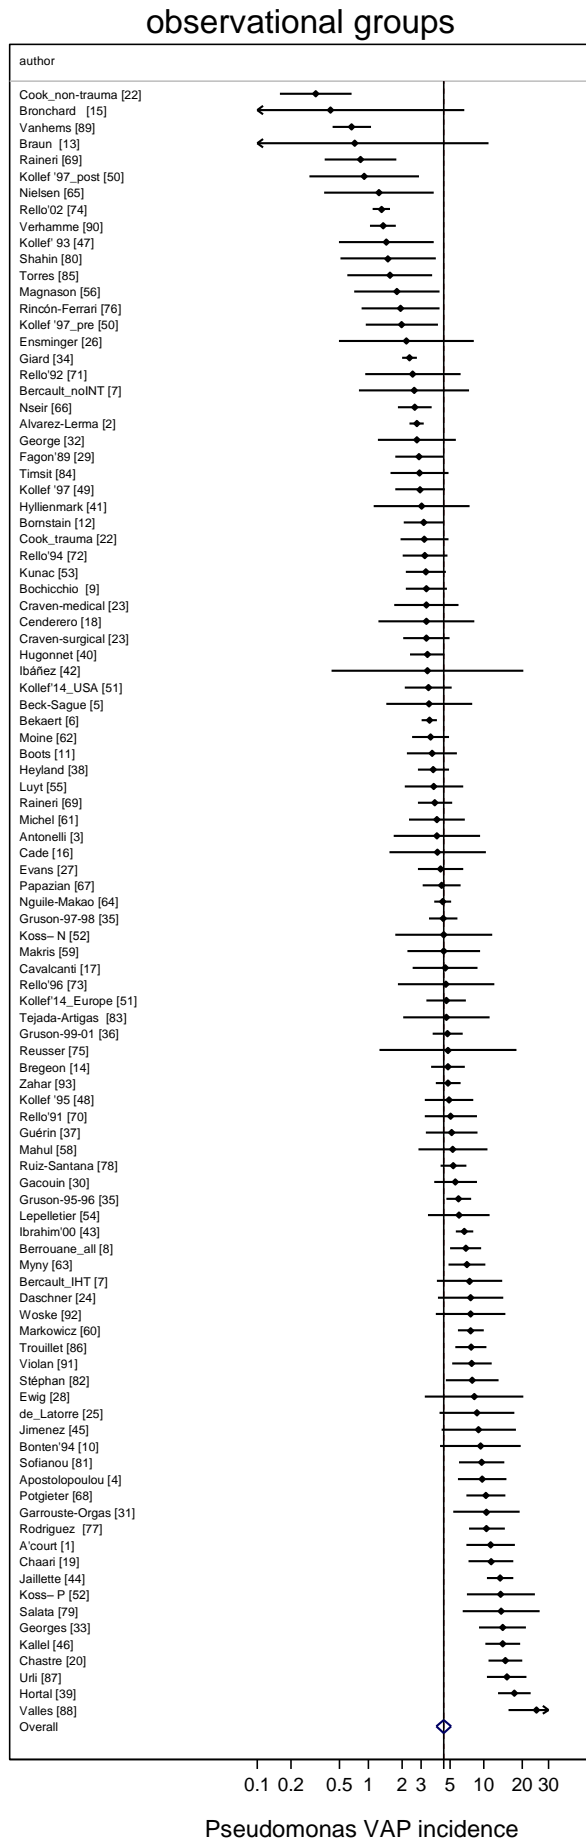

Fig S3

*Pseudomonas* VAP incidence among observational studies. Caterpillar plot of the group specific (small diamonds) and summary (central solid line and large open diamond) *Pseudomonas* VAP incidence proportion and 95 % CI. Groups are listed in Table S1. Note that the x axis is a logit scale and that groups with a zero event have a continuity correction (N+0.5) to enable them to appear in the plot. The central solid line is the *Pseudomonas* VAP benchmark. The corresponding funnel plot is presented in Fig S9.

### control groups from non-PM studies

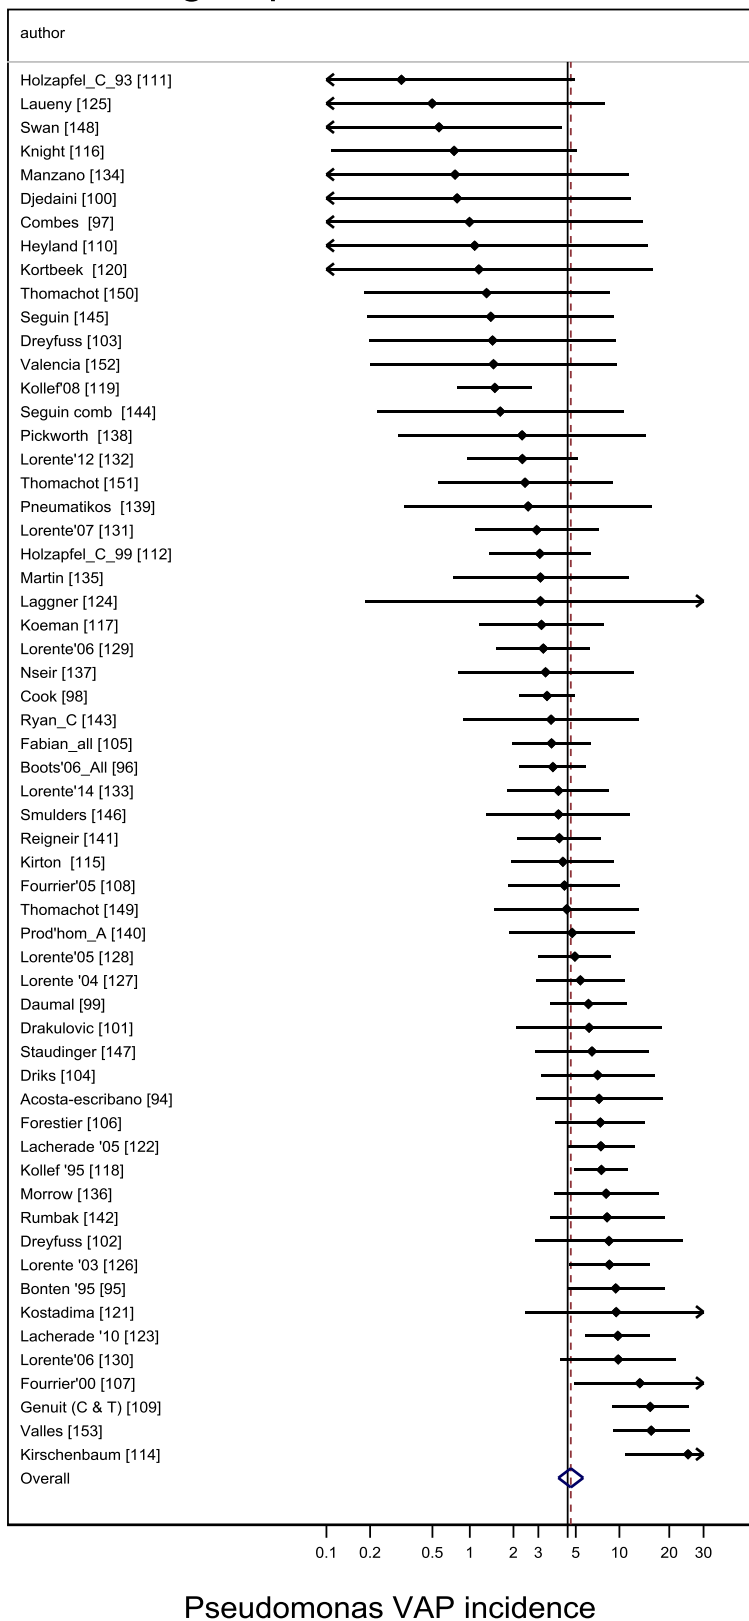

Fig S4

*Pseudomonas* VAP incidence among control groups from studies of non-polymyxin methods. Caterpillar plots of the group specific (small diamonds) and summary (central broken line and large open diamond) *Pseudomonas* VAP incidence and 95% CI. Groups are listed in Table S2. Note that the x axis is a logit scale and that groups with a zero event have a continuity correction (N+0.5) to enable them to appear in the plot. The central solid line is the *Pseudomonas* VAP benchmark from Figure S3. The corresponding funnel plot is presented in Fig S10.

### intervention groups from non-PM studies

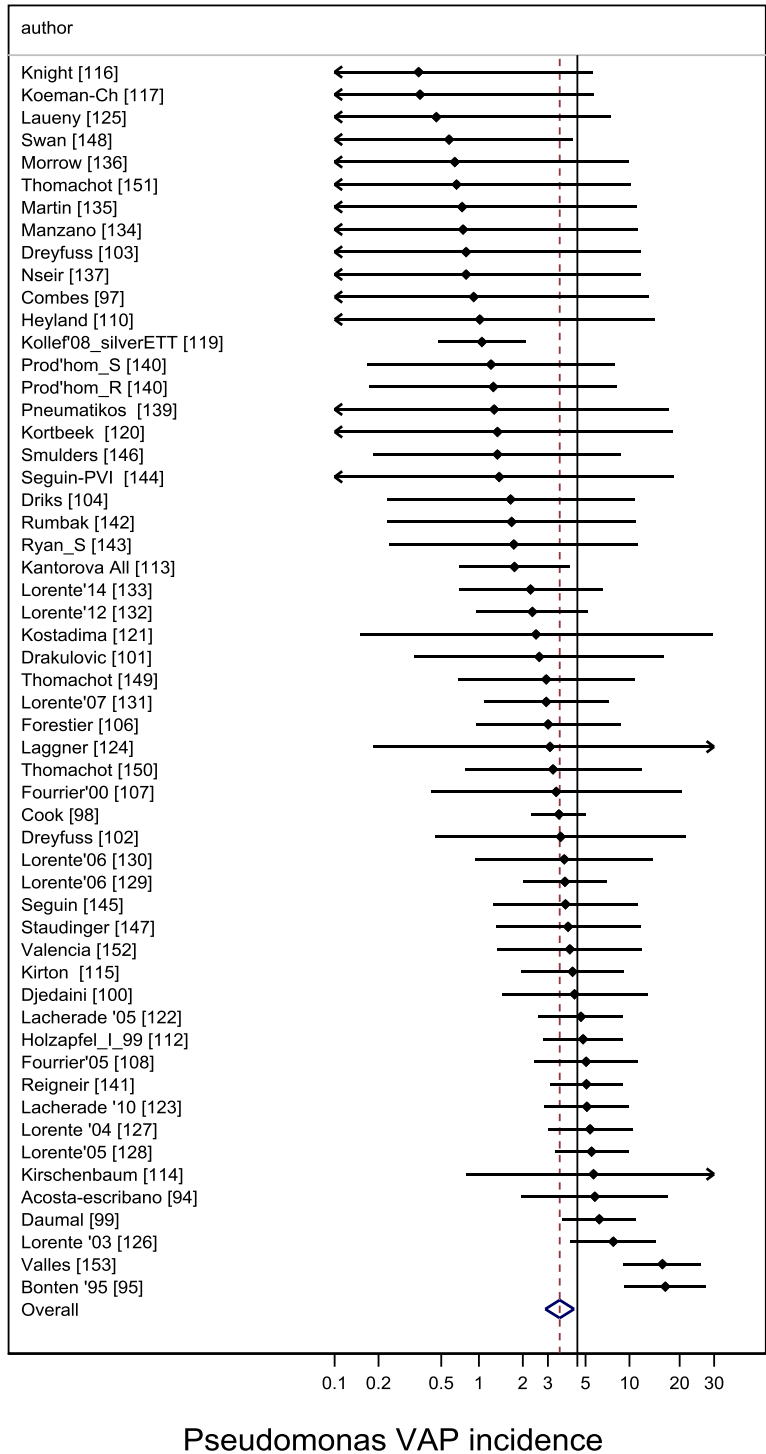

Fig. S5

*Pseudomonas* VAP incidence among intervention groups from studies of non-polymyxin methods. Caterpillar plots of the group specific (small diamonds) and summary (central broken line and large open diamond) *Pseudomonas* VAP incidence and 95% CI. Groups are listed in Table S2. Note that the x axis is a logit scale and that groups with a zero event have a continuity correction (N+0.5) to enable them to appear in the plot. The central solid line is the *Pseudomonas* VAP benchmark from Figure S3. The corresponding funnel plot is presented in Fig S11.

## NCC groups from PM studies

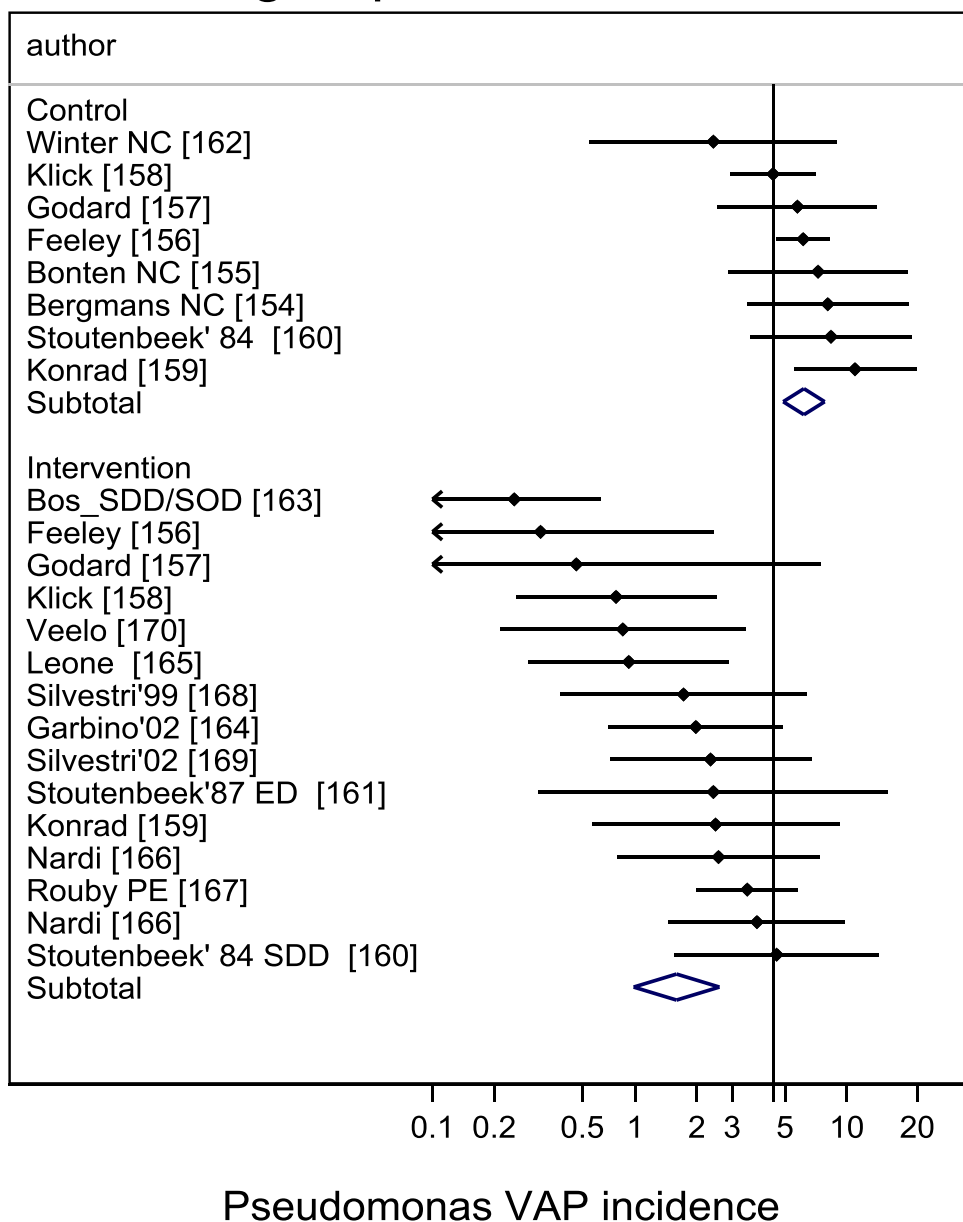

Fig S6

*Pseudomonas* VAP incidence among non-concurrent controlled studies of topical polymyxin. Caterpillar plots of the group specific (small squares) and summary (large open diamonds) *Pseudomonas* VAP incidence proportion and 95 % CI. Groups are listed in Table S3. Note that the x axis is a logit scale and that groups with a zero event have a continuity correction (N+0.5) to enable them to appear in the plot. The central solid line is the *Pseudomonas* VAP benchmark from Figure S3. The corresponding funnel plot for the control groups are presented in Fig S12 & S14.

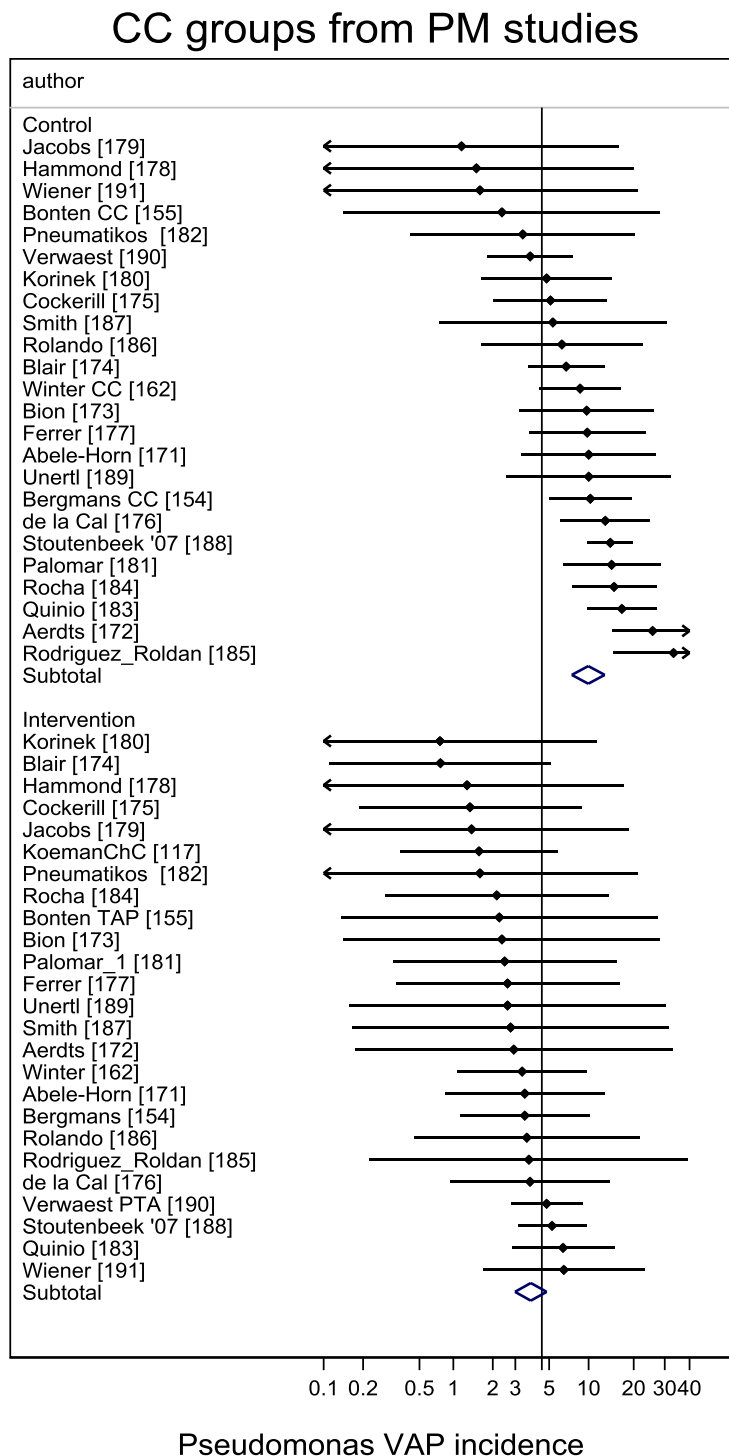

Fig S7

*Pseudomonas* VAP incidence among concurrent controlled studies of topical polymyxin. Caterpillar plots of the group specific (small squares) and summary (large open diamonds) *Pseudomonas* VAP incidence proportion and 95 % CI. Groups are listed in Table S4. Note that the x axis is a logit scale and that groups with a zero event have a continuity correction (N+0.5) to enable them to appear in the plot. The central solid line is the *Pseudomonas* VAP benchmark from Figure S3. The corresponding funnel plot for the control groups are presented in Fig S14 & S15.

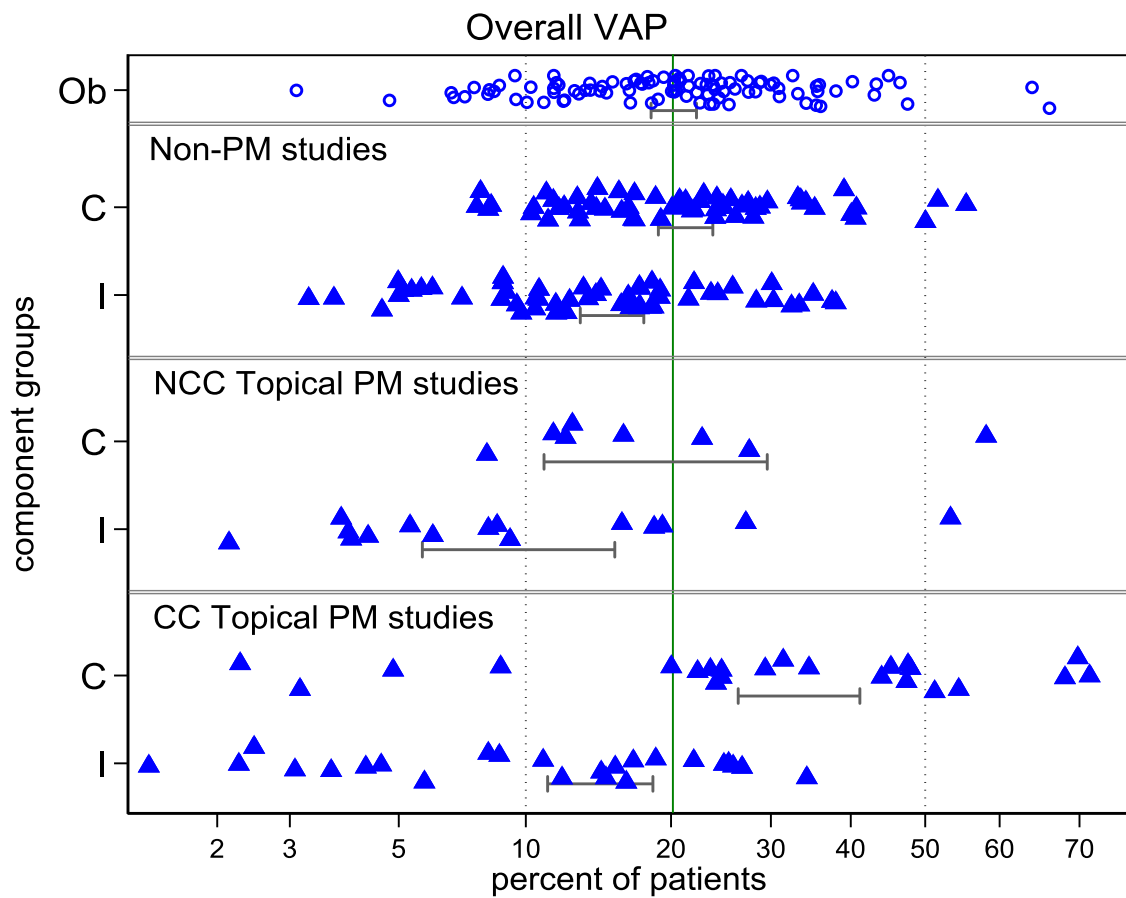

Fig S8. Overall VAP incidence per 100 patients for all component groups together with 95 % confidence intervals of summary incidence. Ob is observational groups (open symbols), C is control groups, I is interventional groups (closed triangles). Note that the x axis is a logit scale and that groups with a zero event have a continuity correction ( $N+0.5$ ) to enable them to appear in the plot. The vertical line is the VAP benchmark derived from the observational groups.

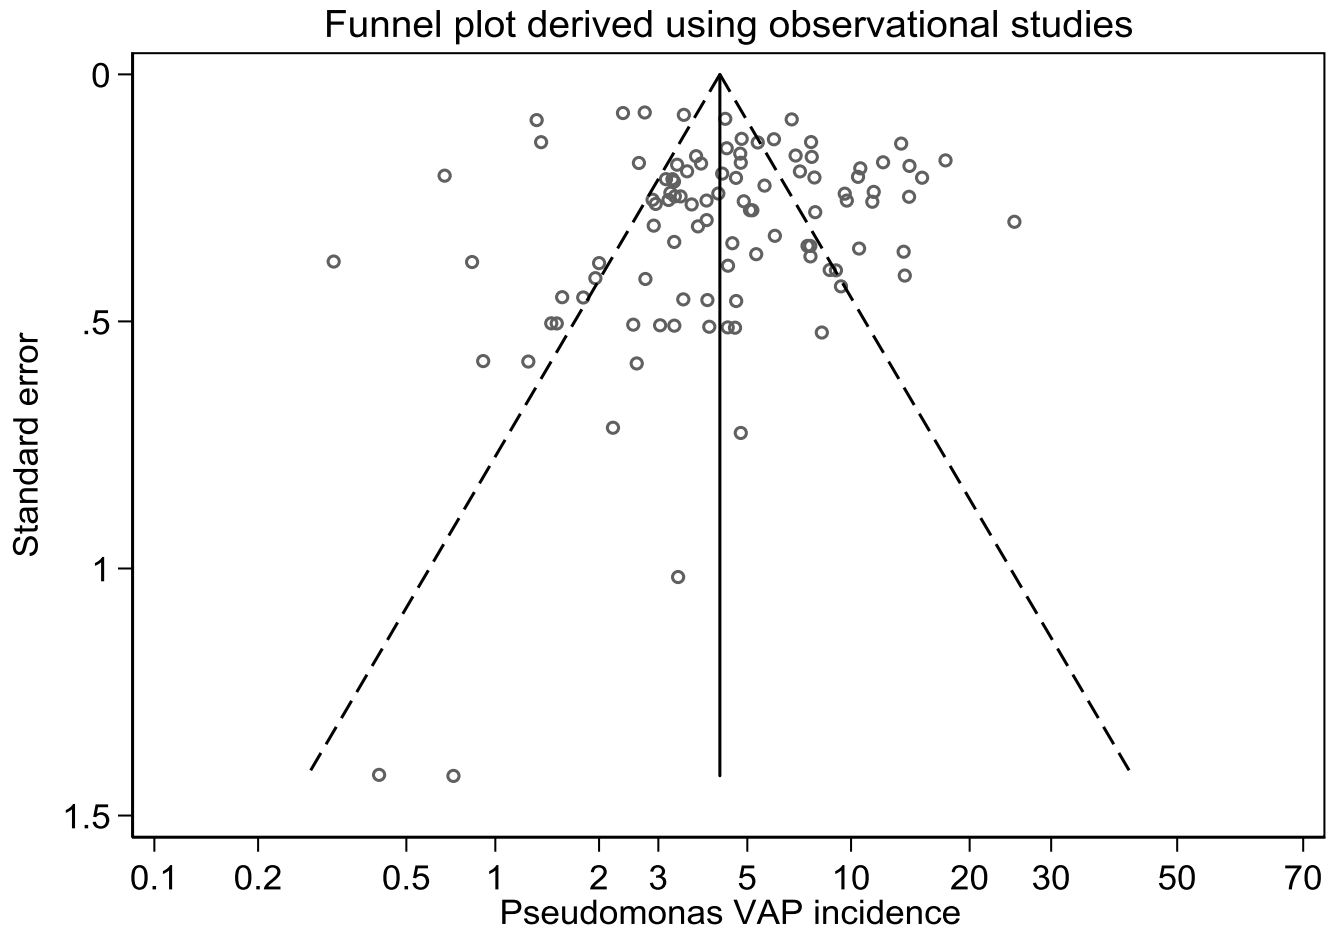

Fig S9 PsVAP incidence funnel plots for groups from observational studies. Note that the x axis is a logit scale and that groups with a zero event have a continuity correction ( $N+0.5$ ) to enable them to appear in the plot. The vertical dotted line is the PsVAP benchmark derived from the observational groups.



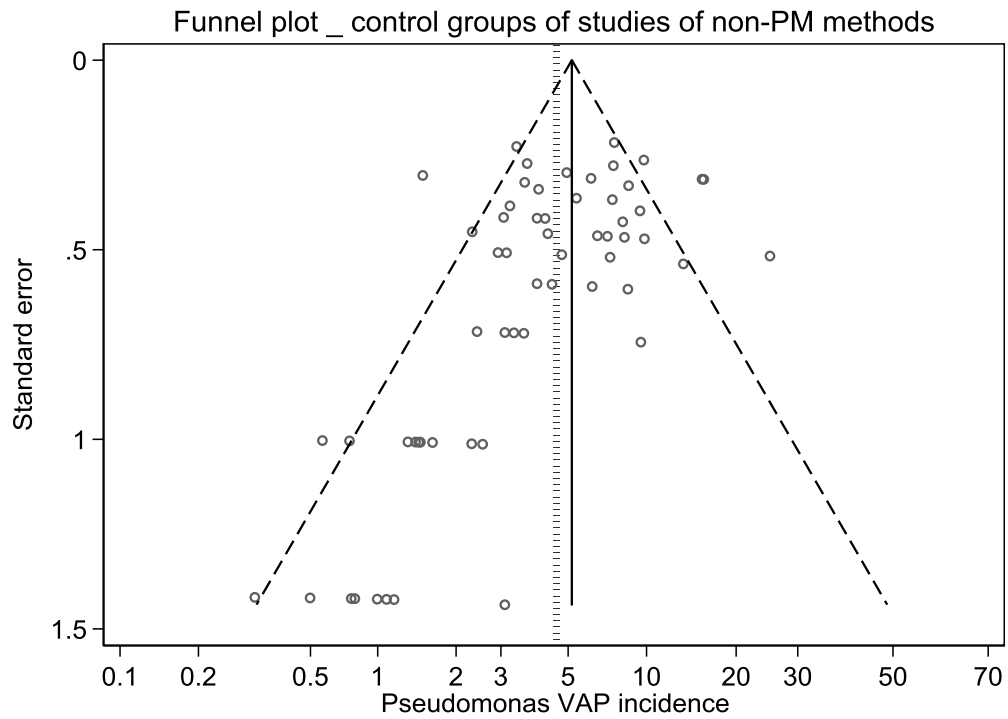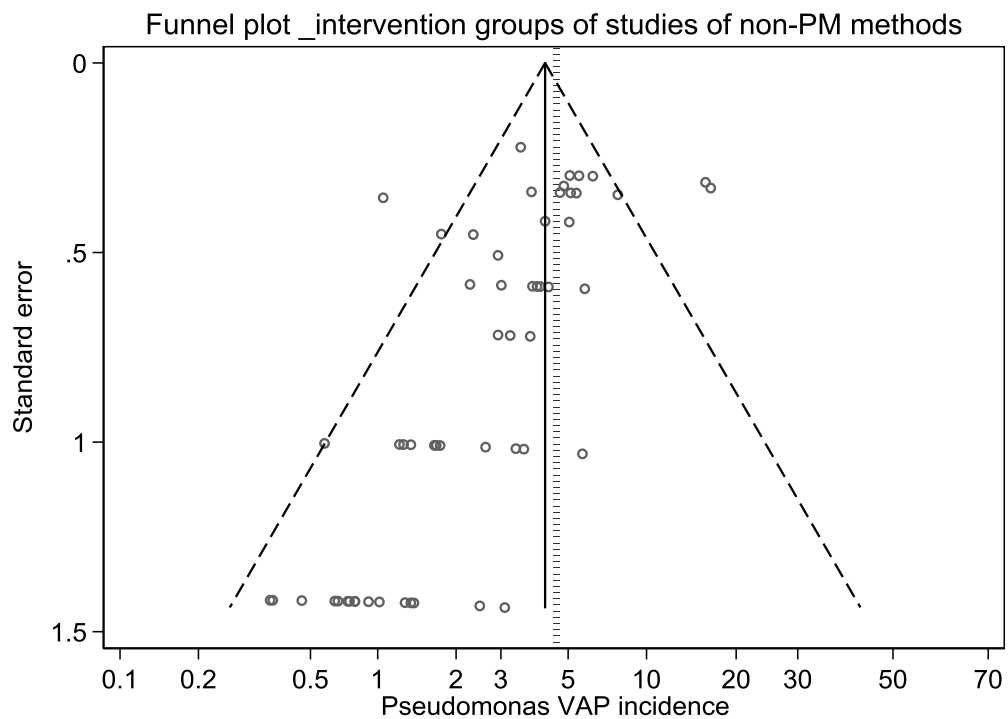

Fig S10 & S11 PsVAP incidence funnel plots for control (Fig S10 top) and intervention (Fig S11 bottom) groups studies of non-PM methods. Note that the x axis is a logit scale and that groups with a zero event have a continuity correction ( $N+0.5$ ) to enable them to appear in the plot. The vertical dotted line is the PsVAP benchmark derived from the observational groups.

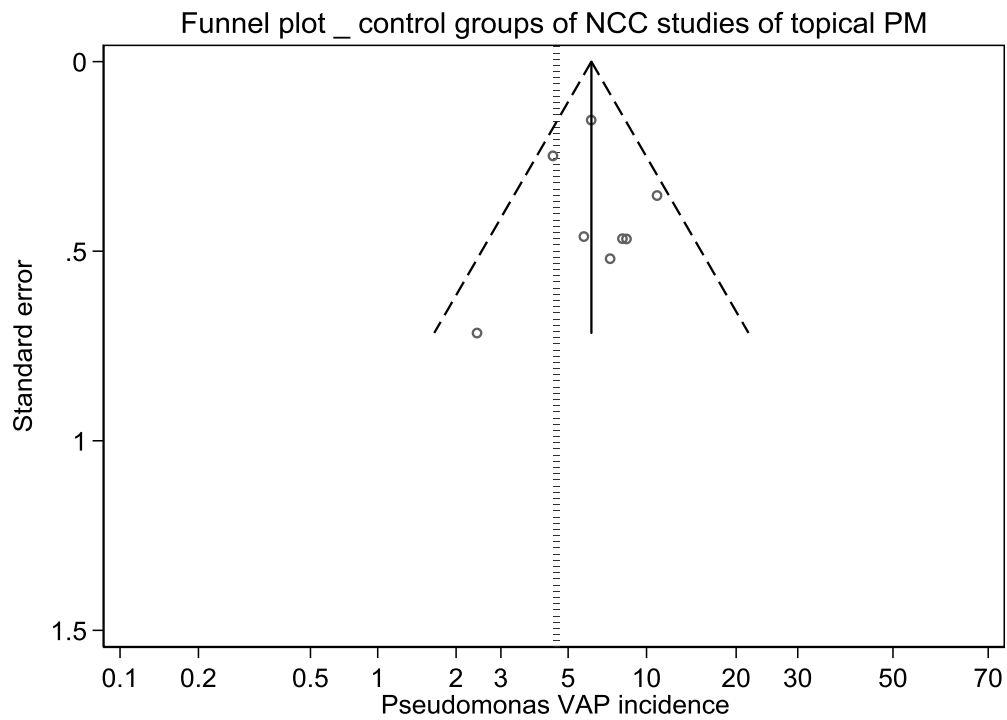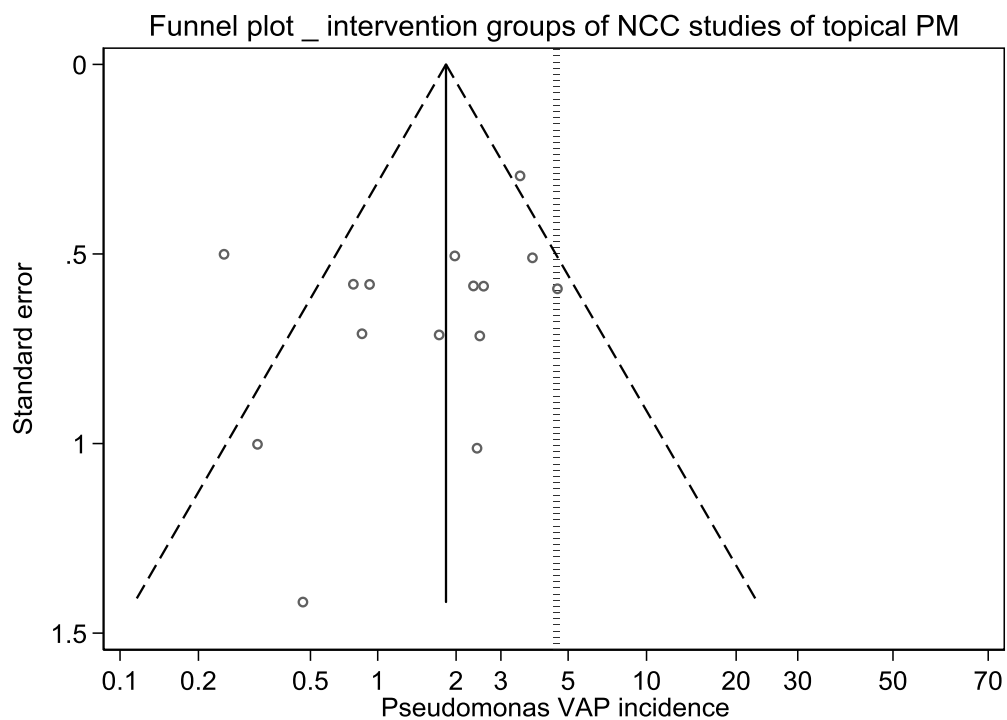

Fig S12 & S13 PsVAP incidence funnel plots for control (Fig S12 top) groups and intervention (Fig S13 bottom) of NCC design studies of PM methods. Note that the x axis is a logit scale and that groups with a zero event have a continuity correction ( $N+0.5$ ) to enable them to appear in the plot. The vertical dotted line is the PsVAP benchmark derived from the observational groups.

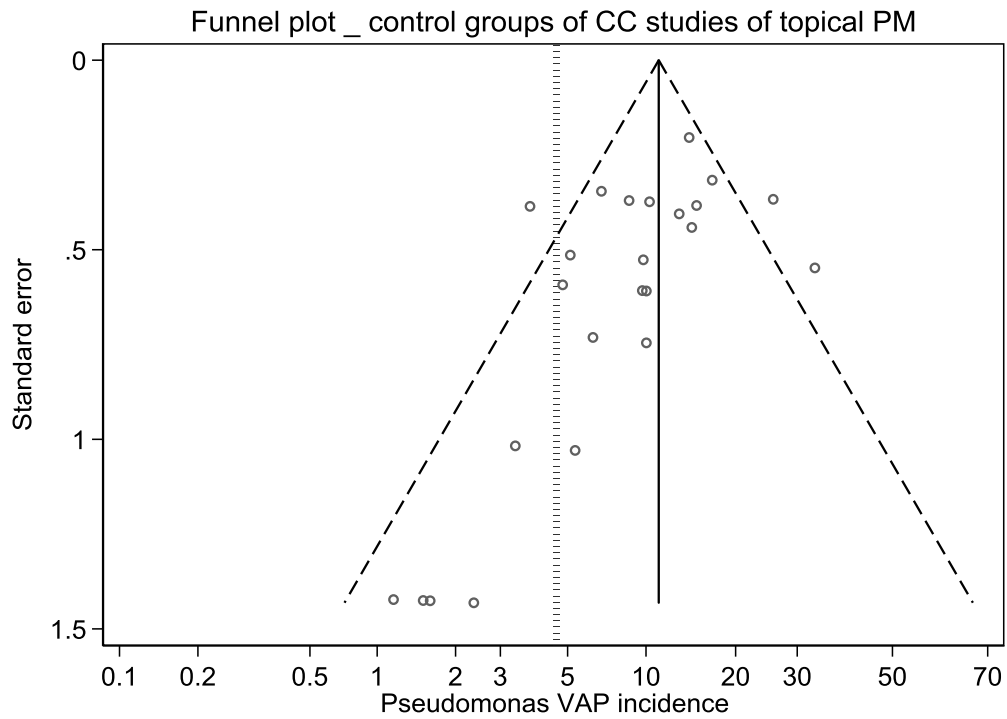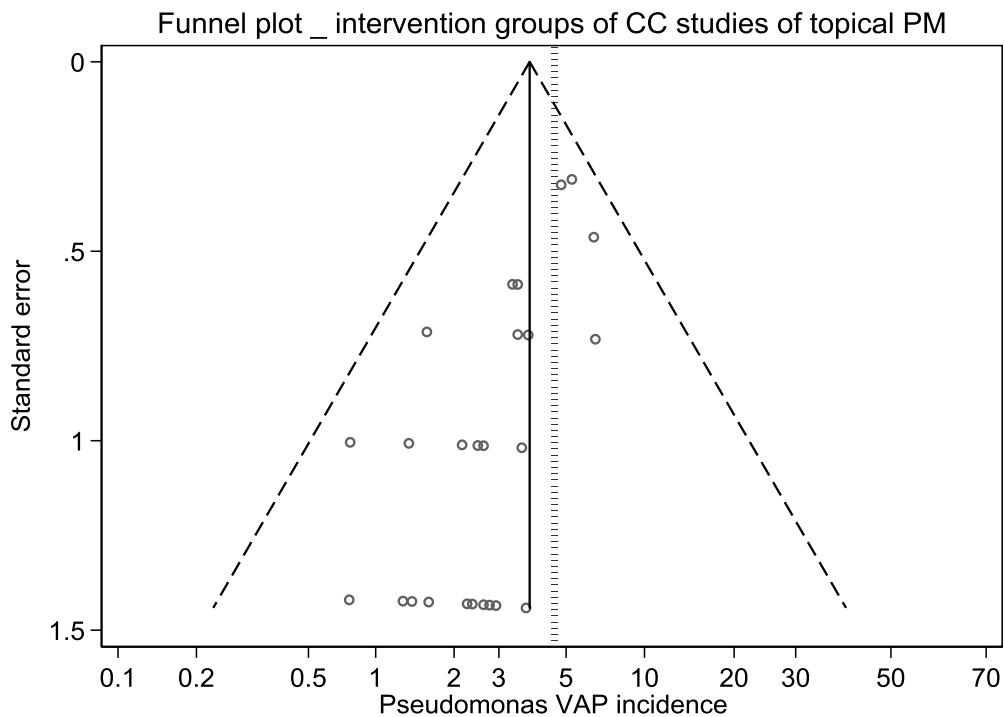

Fig S14 & S15 PsVAP incidence funnel plots for control (Fig S14 top) groups and intervention (Fig S15 bottom) of CC design studies of PM methods. Note that the x axis is a logit scale and that groups with a zero event have a continuity correction ( $N+0.5$ ) to enable them to appear in the plot. The vertical dotted line is the PsVAP benchmark derived from the observational groups.

## Component groups from 3 hybrid studies

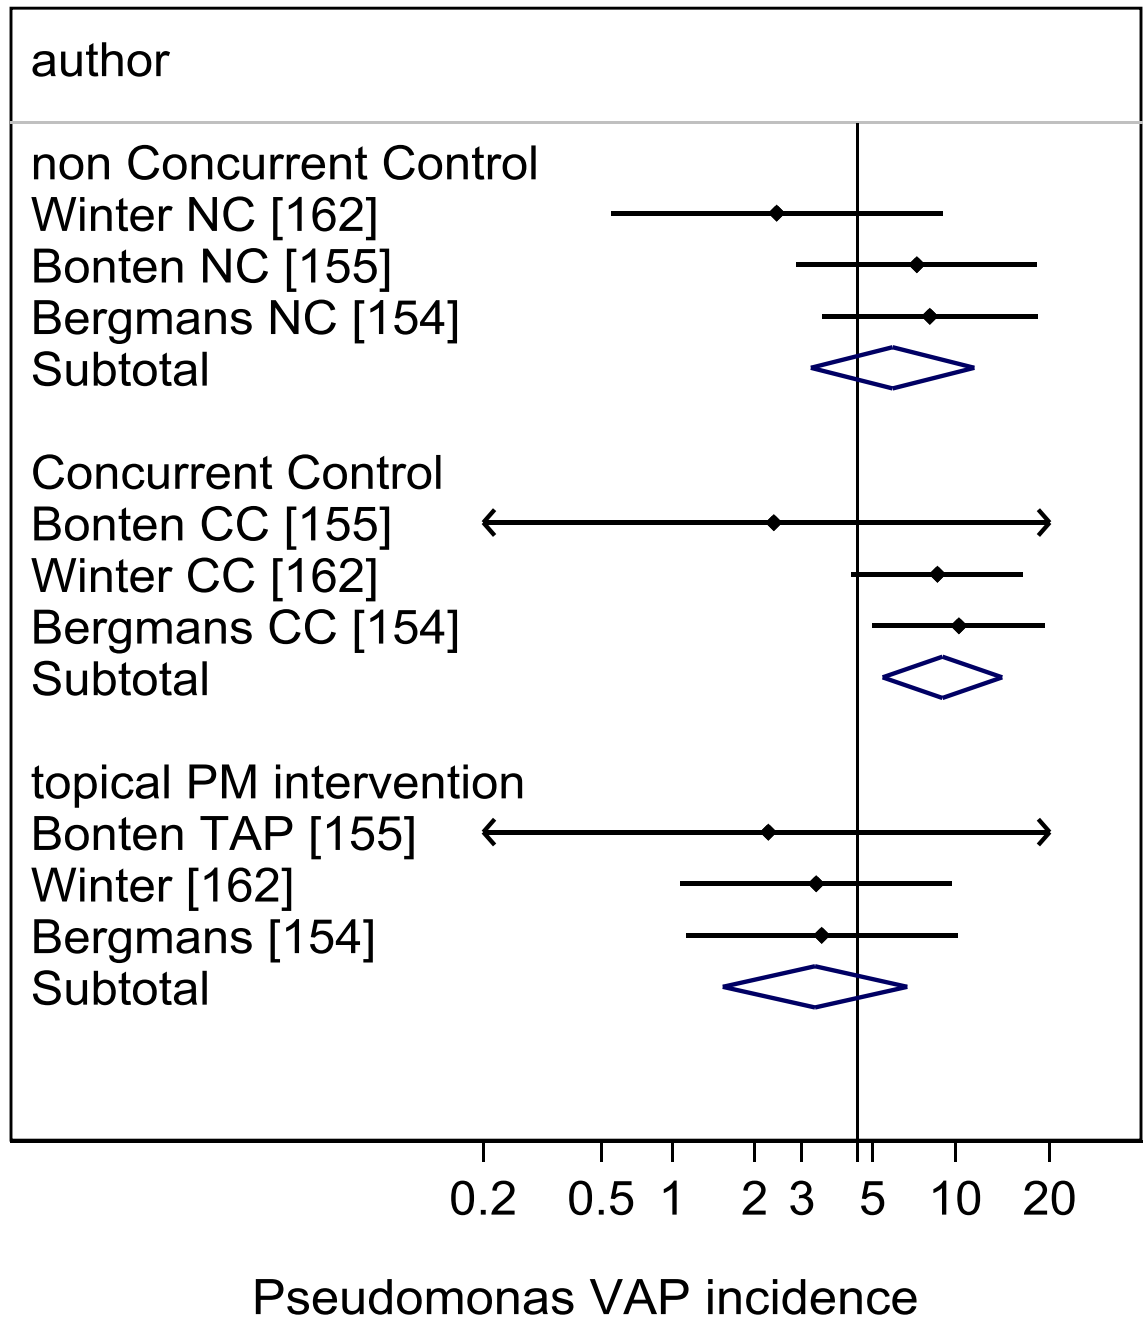

Fig S16 *Pseudomonas* VAP incidence among component groups of three studies of topical polymyxin with hybrid non-concurrent and concurrent controlled design. Caterpillar plots of the group specific (small squares) and summary (large open diamonds) *Pseudomonas* VAP incidence proportion and 95 % CI. Groups are listed in Table S3 and S4. Note that the x axis is a logit scale and that groups with a zero event have a continuity correction (N+0.5) to enable them to appear in the plot. The central solid line is the *Pseudomonas* VAP benchmark from Figure S3.
